# Supplementary material for: Products of the iterative polyketide synthases in 9- and 10-membered enediyne biosynthesis
Source: Royal Society of Chemistry journal article supplement (doi:10.1039/b916751j), 2009-01-01
Supplement: b916751j.doc [file b916751j.doc]

**Supplementary Information**

**Products of the Iterative Polyketide Synthases in 9- and 10-Membered Enediyne Biosynthesis**

*Huihua Suna, Rong Konga, Di Zhub, Min Lub, Qiang Jia, Chong Wai Liewa, Julien Lescara, Guofu Zhongb*, Zhao-Xun Lianga**

**Supporting Figures**


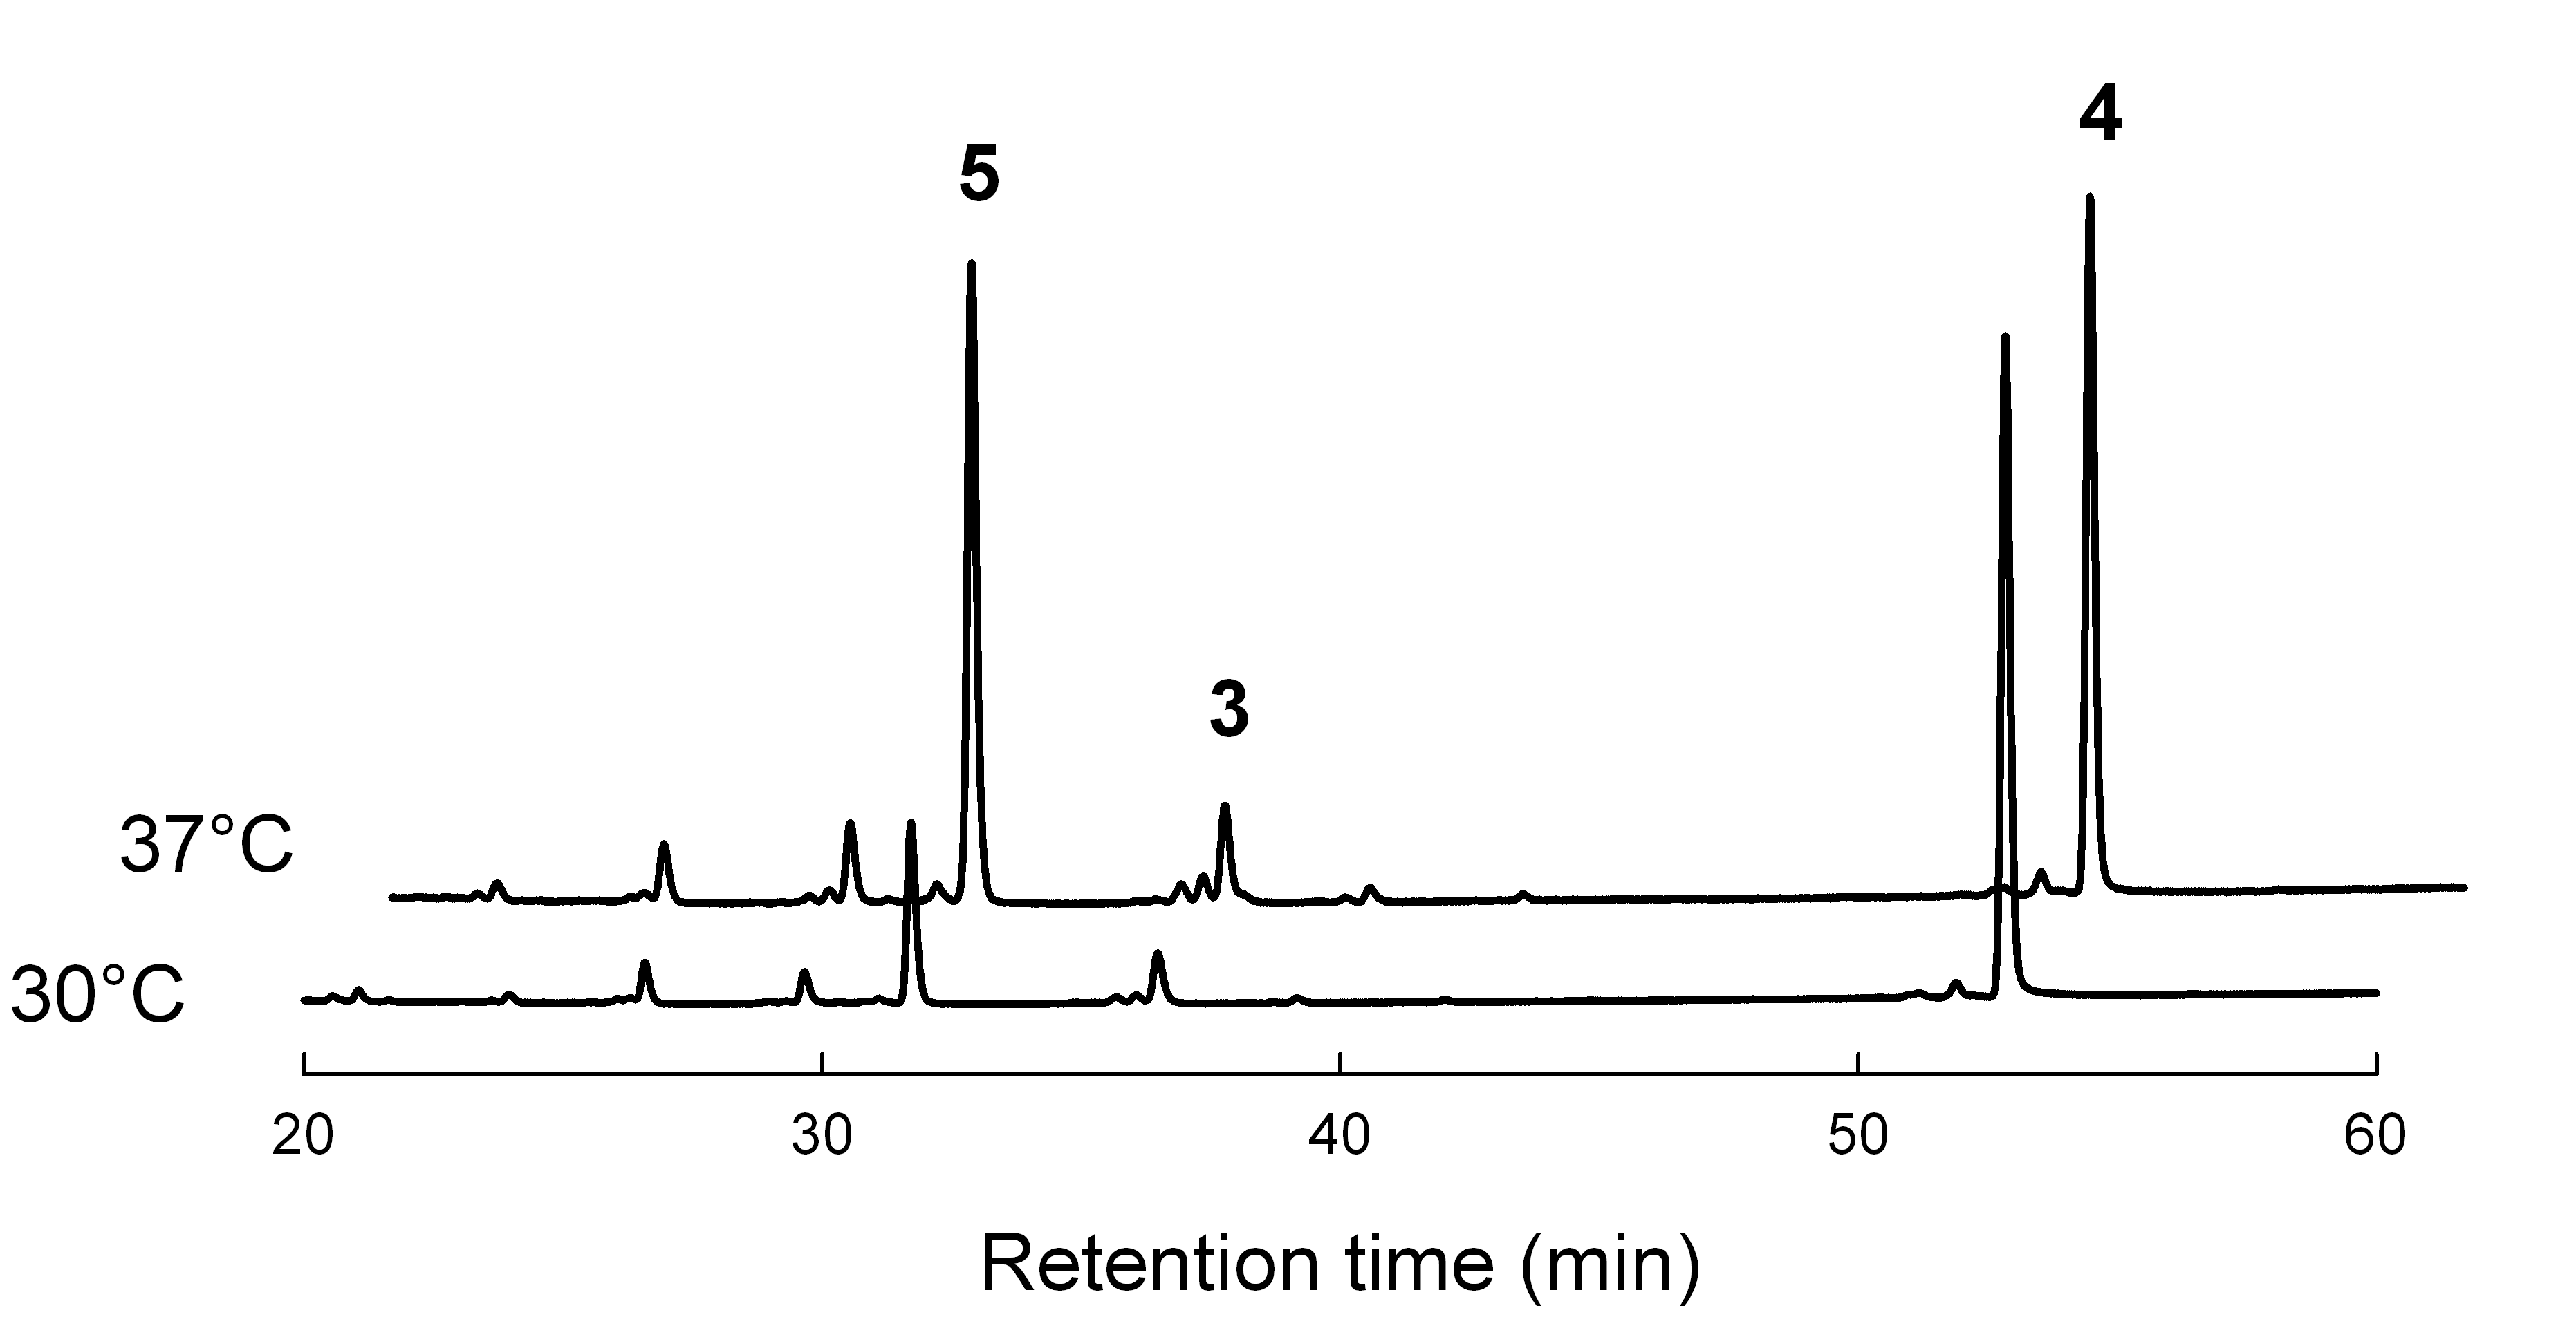


Figure S1. HPLC analysis of the temperature-dependent product formation for SgcE-SgcE10. Assay conditions: 3.1 μM SgcE, 62.9 μM SgcE10, 0.075mM NADPH, 1.4 mM Malonyl-CoA, Tris (pH8.5), 300 mM NaCl, 1 mM DTT.


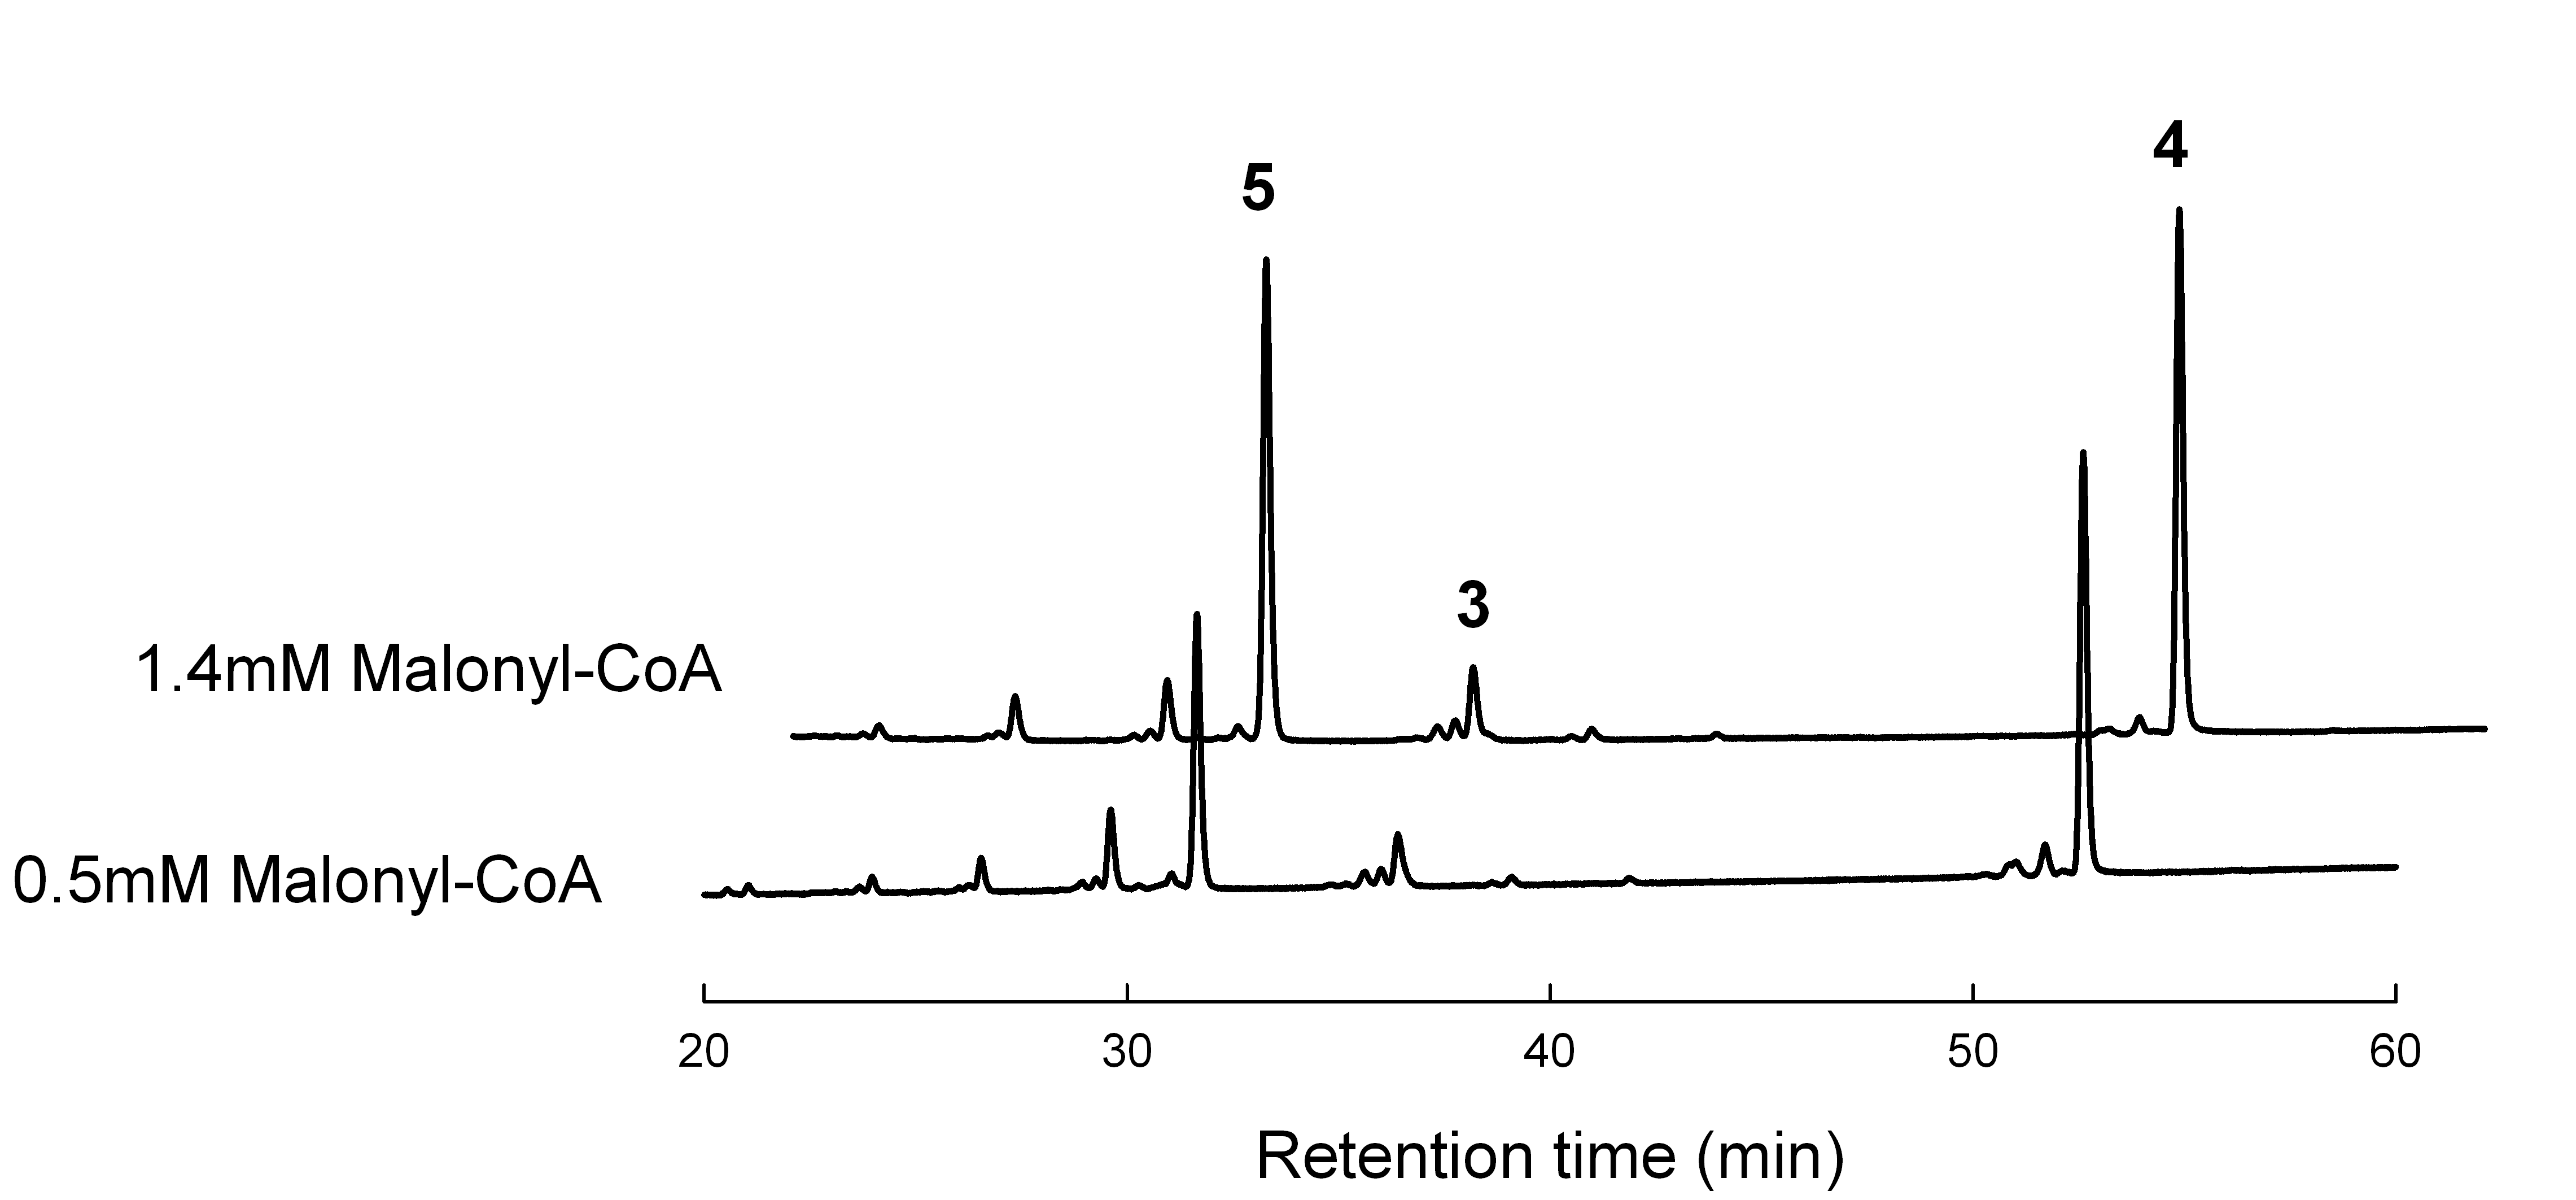


Figure S2. HPLC analysis of the malonyl CoA-dependent product formation for SgcE-SgcE10. Assay conditions: 3.1 μM SgcE, 62.9 μM SgcE10, 0.075 mM NADPH, Tris (pH 8.5), 37°C, 300 mM NaCl, 1 mM DTT.


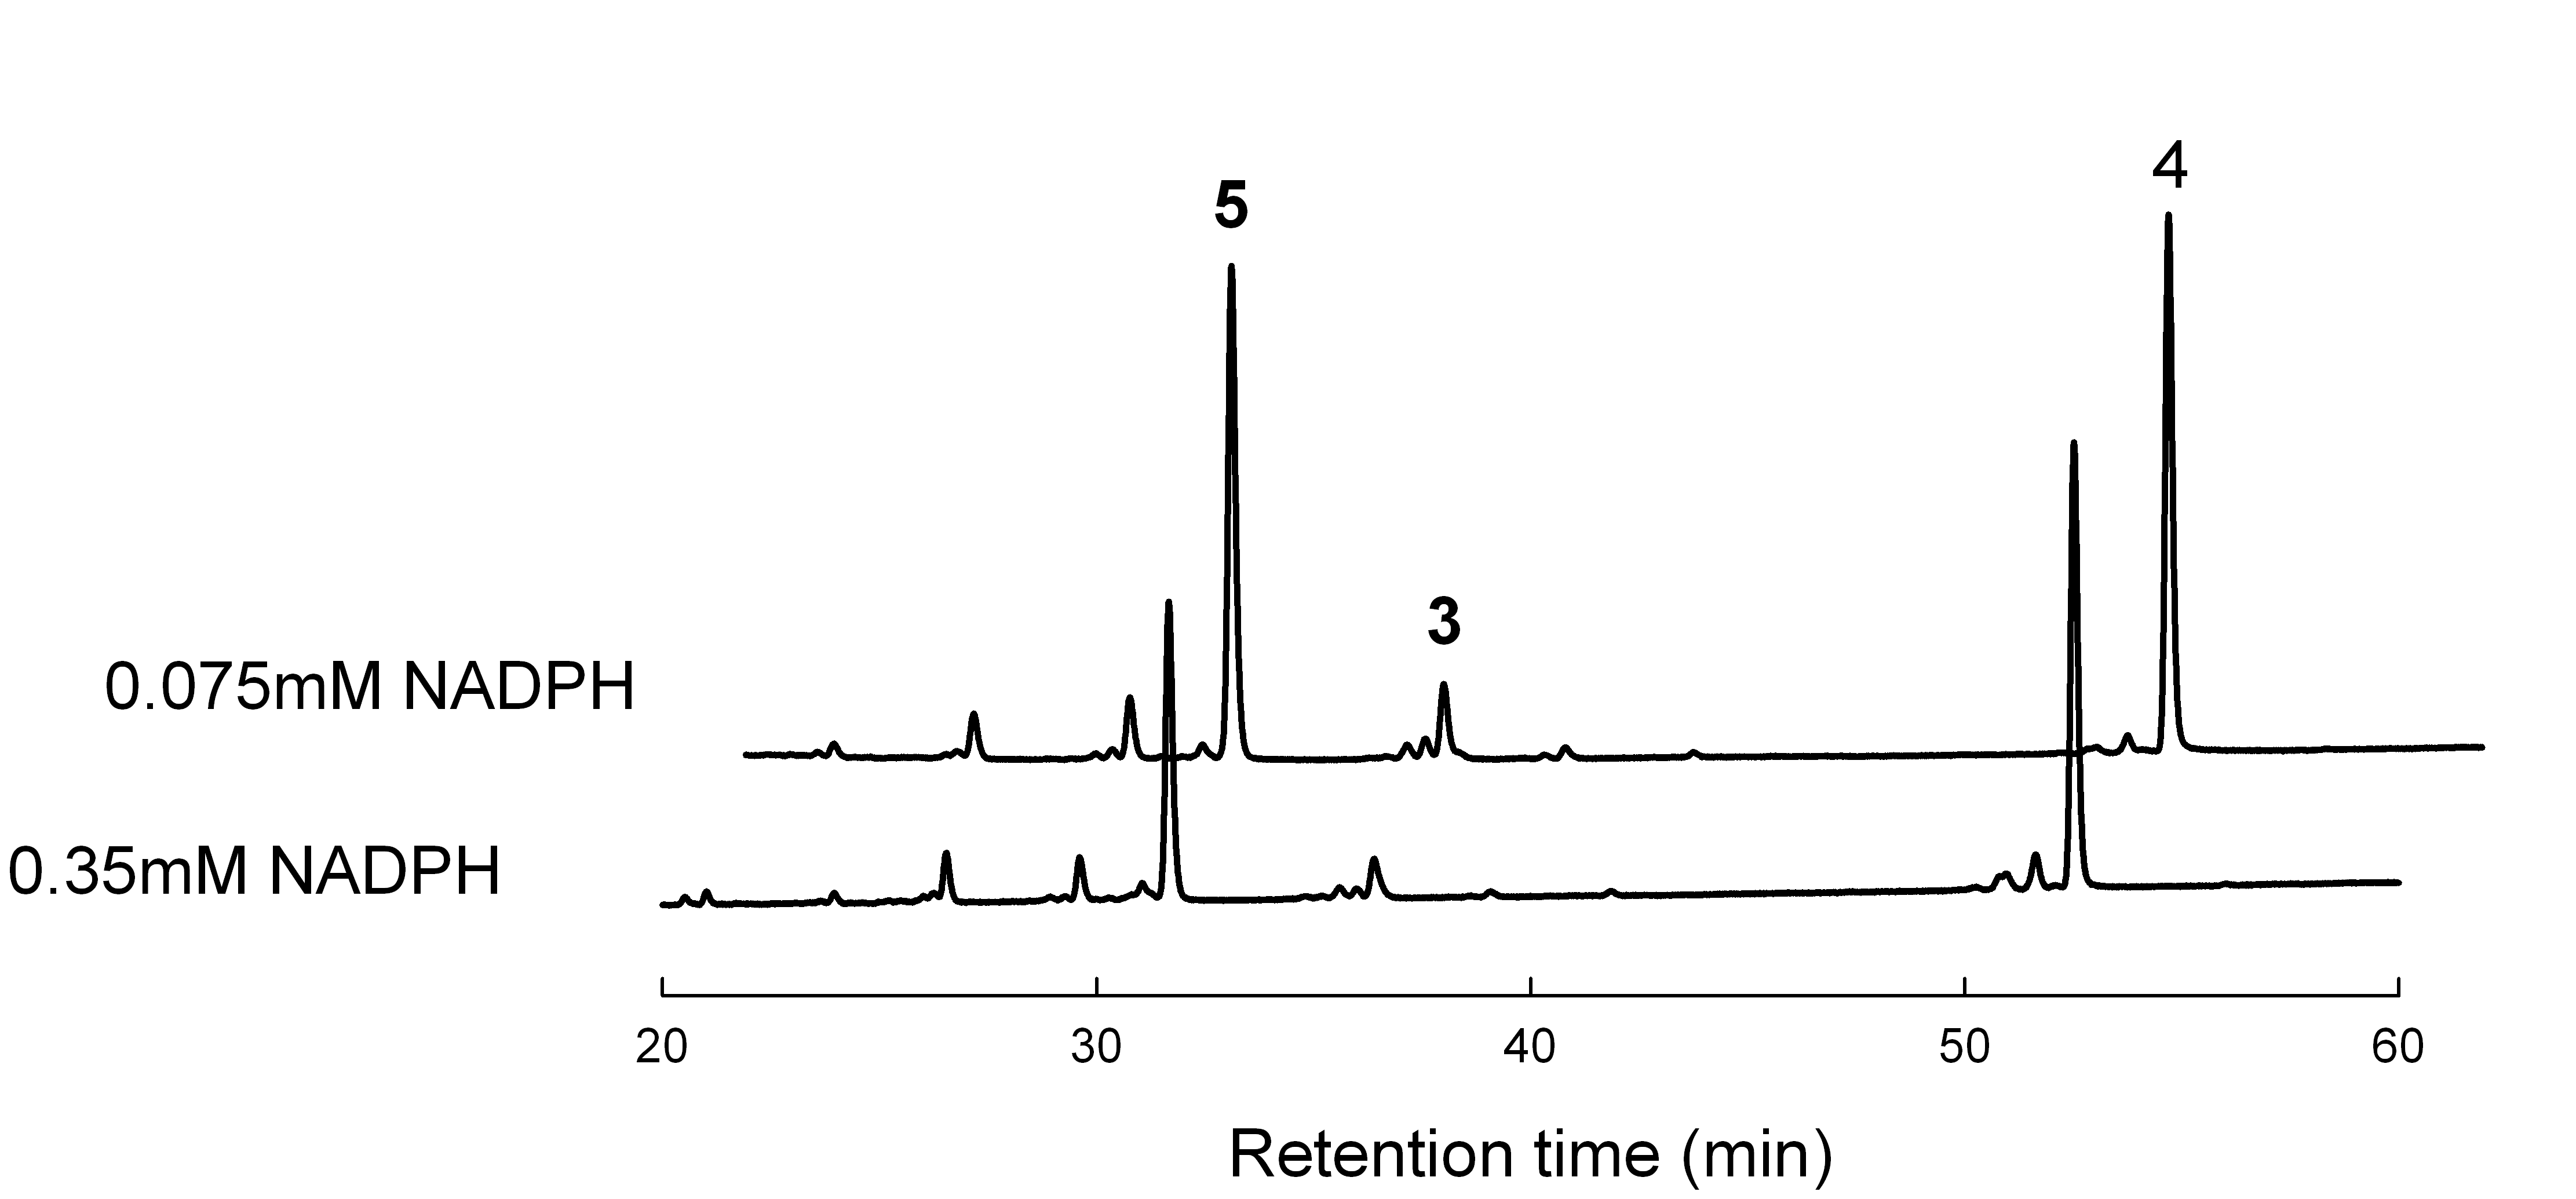


Figure S3. HPLC analysis of the NADPH-dependent product formation for SgcE-SgcE10. Assay conditions: 3.1 μM SgcE, 62.9 μM SgcE10, 1.4 mM Malonyl-CoA, Tris (pH8.5), 37°C, 300 mM NaCl, 1 mM DTT.

**
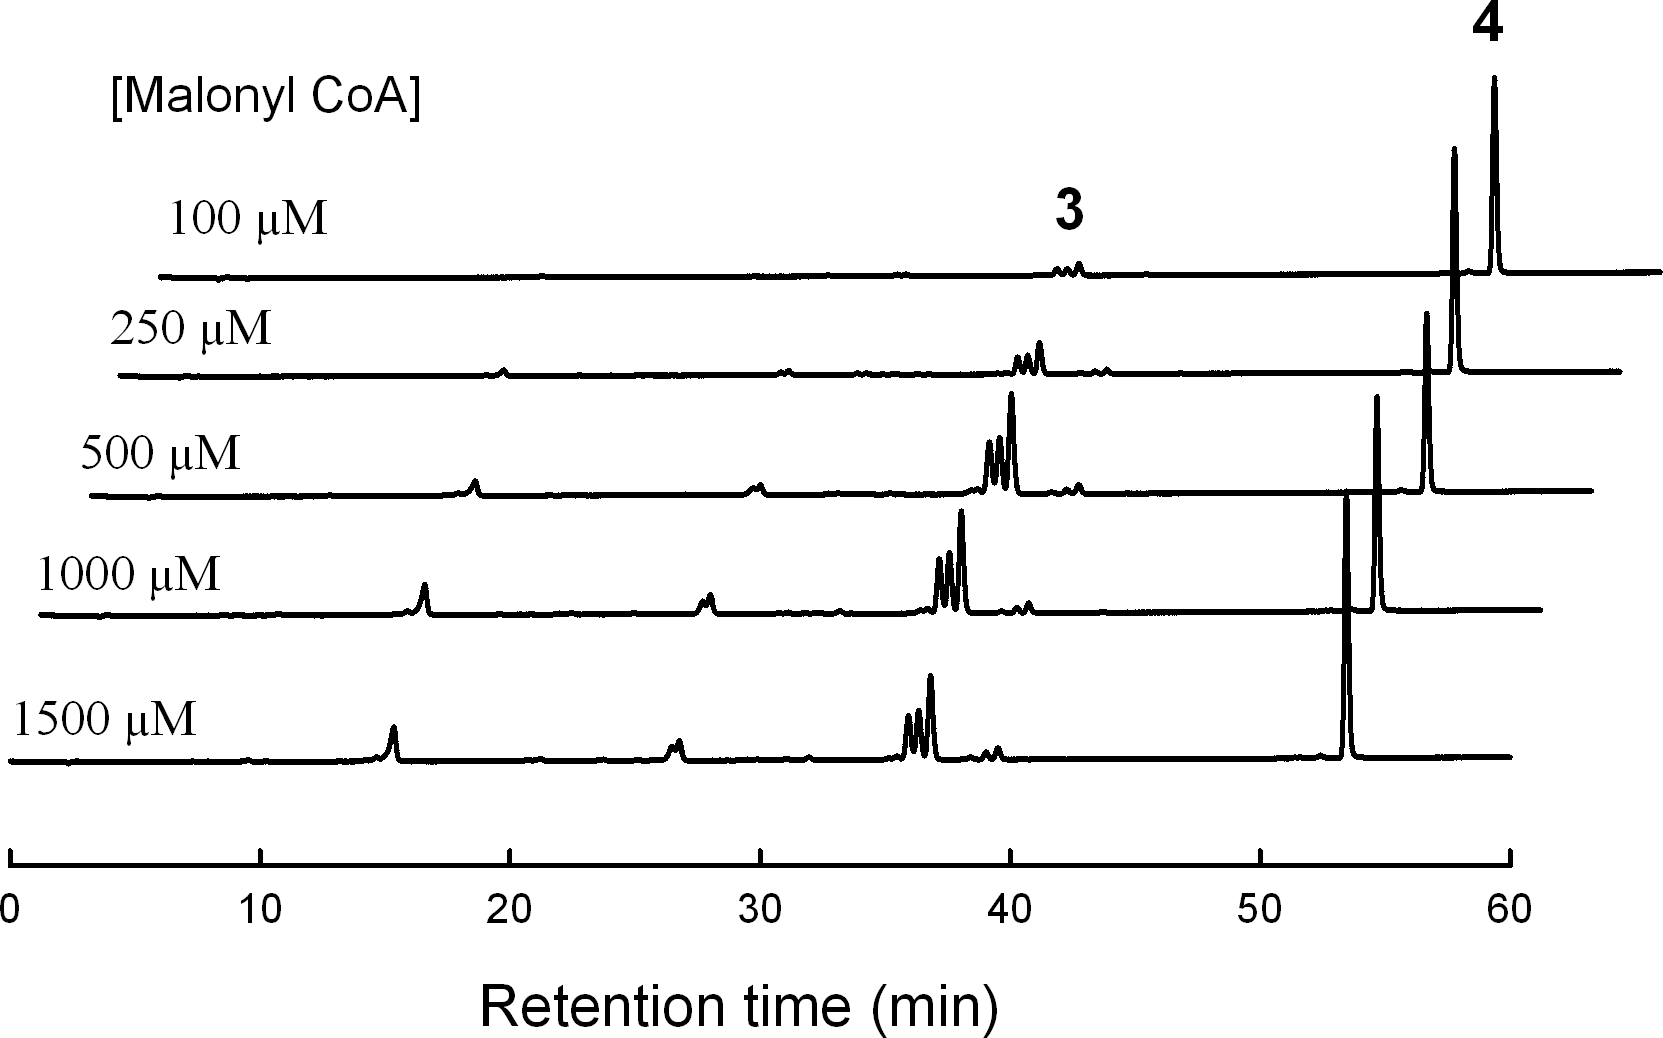
**

**Figure S4.** HPLC analysis of the malonyl CoA-dependent product formation for CalE8. Experimental conditions: 0**.**14 mg/ml CalE8, 0.63 mg/ml CalE7, 0.10 ~ 1.50 mM Malonyl-CoA, 1.0 mM NADPH, Tris (pH8.2), 30°C for 3 hours, 300 mM NaCl, 1 mM DTT.

**
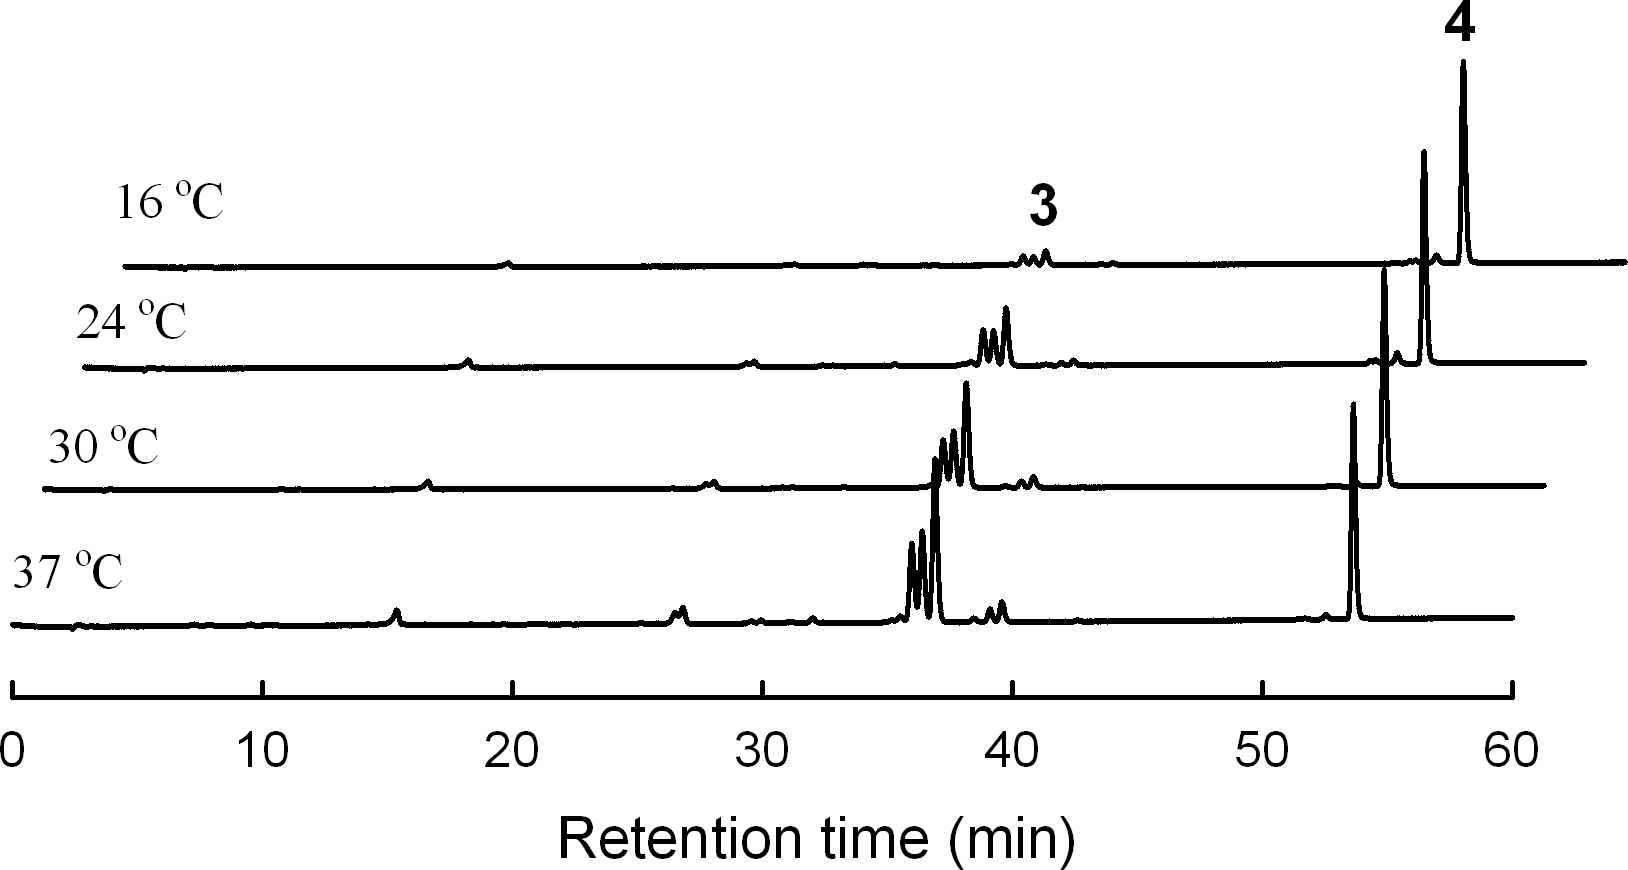
**

**Figure S5.** HPLC analysis of the temperature-dependent product formation for CalE8. Experimental conditions: 0**.**14 mg/ml CalE8, 0.63 mg/ml CalE7, 0.25 mM malonyl-CoA, 0.25 mM NADPH, Tris (pH8.2), 16 ~ 37°C for 3 hours, 300 mM NaCl, 1 mM DTT.

**
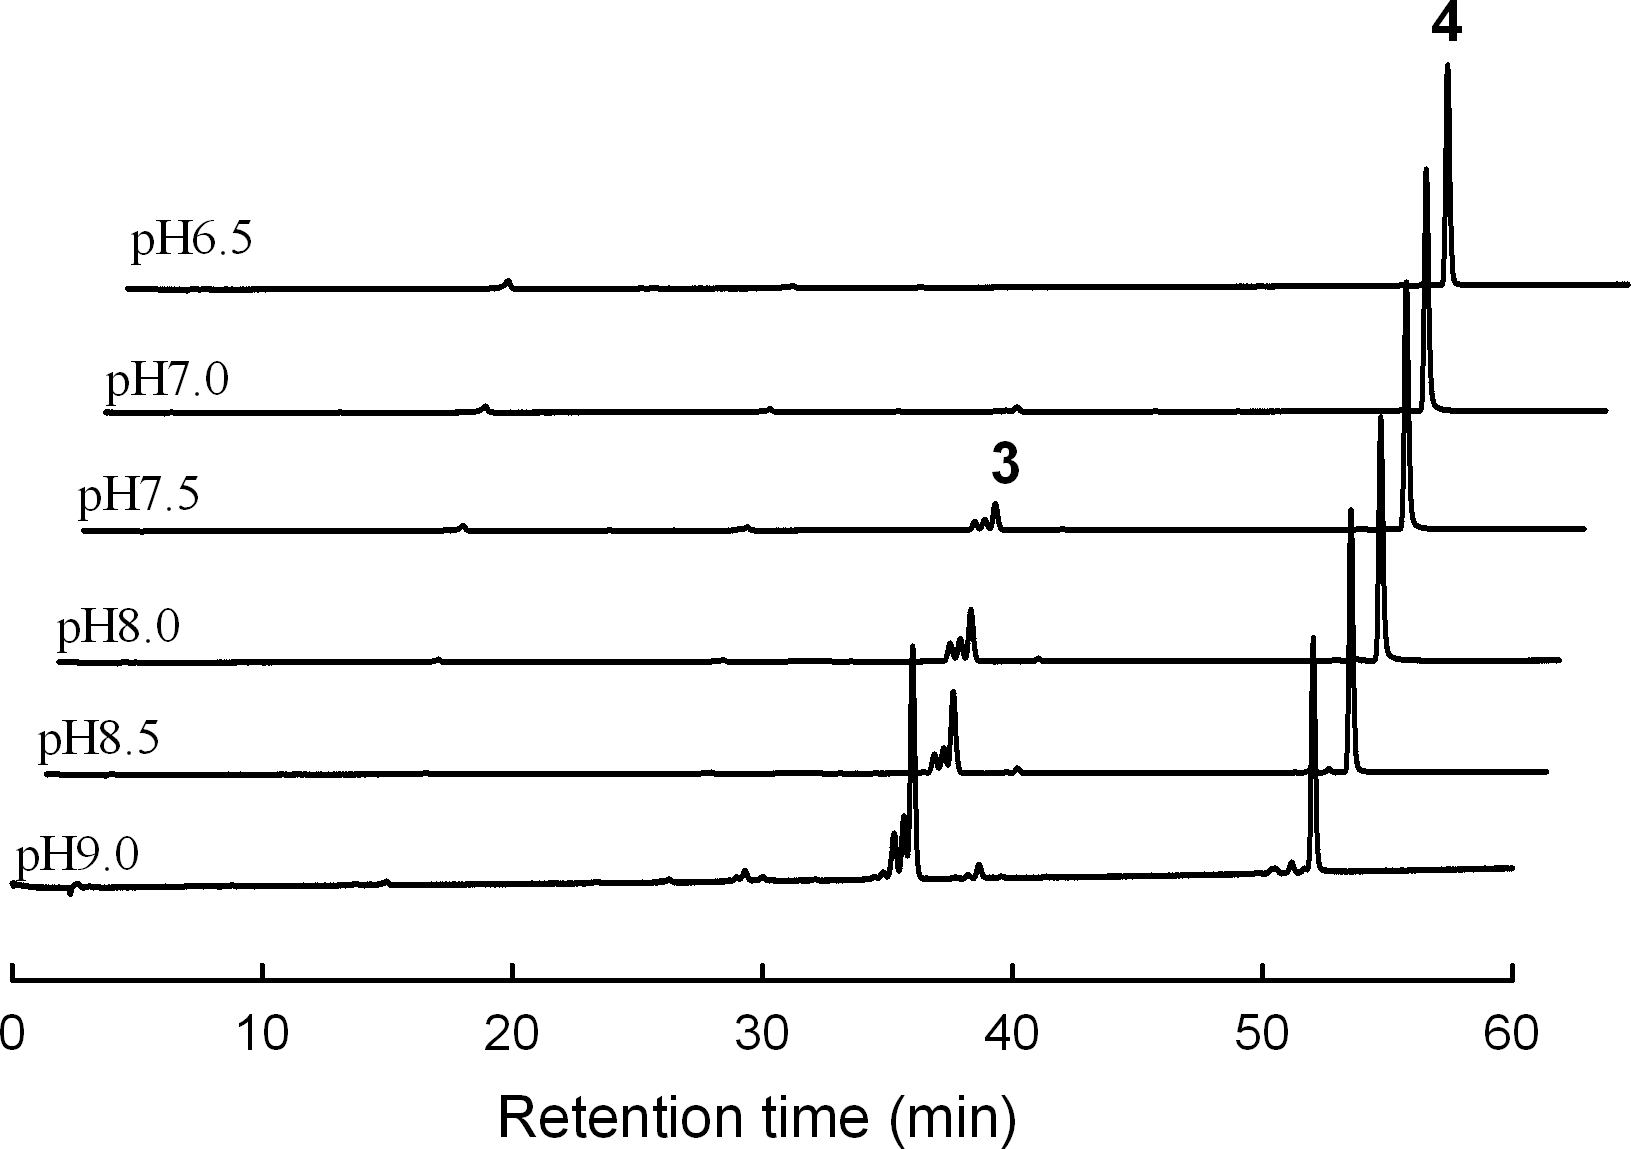
**

**Figure S6.** HPLC analysis of the pH-dependent product formation for CalE8/E7. Experimental conditions: 0.14 mg/ml CalE8, 0.63 mg/ml CalE7, 0.25 mM malonyl-CoA, 0.25 mM NADPH, Phosphate ( pH 6.5, 7.0, 7.5, 8.0) / Tris ( pH 8.5) / CHES ( pH 9.0), 24°C for 3 hours,300 mM NaCl, 1 mM DTT.

**
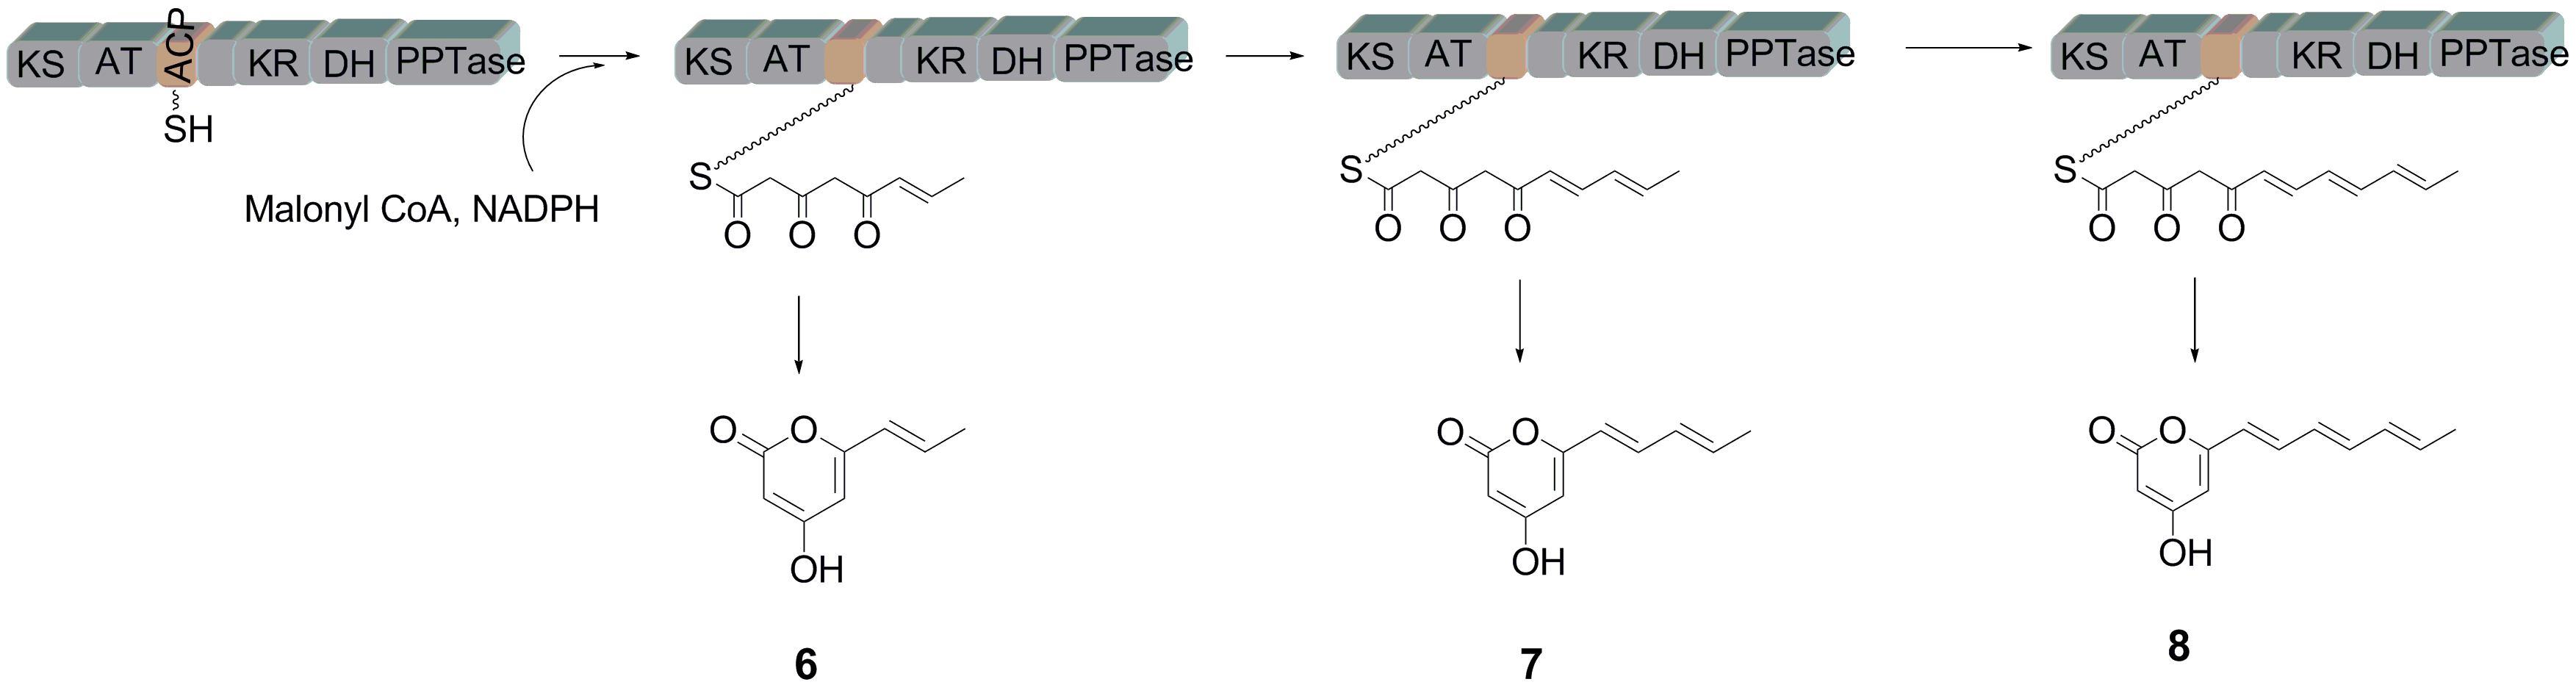
**

**Figure S7.** Schematic illustration of the formation of the pyrone by-products 6, 7 and 8.

**Experimental Section**

**Materials.** CoA, acetyl CoA, malonyl CoA, NADPH and other chemicals were purchased from Sigma-Aldrich and stored at -20 oC. Expression vectors and *E. coli* competent cells were obtained from Novagen and Qiagen. The sequences for the genes encoding the polyketide synthases and thioesterases were obtained from the published sequences deposited in public database (accession numbers: ACG56282, ACG56283, ACB47048, AAN79726, AAL06699, AAL06692)1-4. The genes were synthesized by and obtained from GenScript Corporation (NJ, USA).

**Cloning, expression and purification of the polyketide synthases CalE8, DynE8 and SgcE.** The cloning, expression and purification of CalE8 has been described previously4. The preparation DynE8 and SgcE was carried out following the similar procedures described for CalE8. Briefly, the gene that encodes DynE8 or SgcE8 was cloned into pET-28b(+) between the NdeI and XhoI restriction sites. Then the plasmid harboring the PKS gene was sequenced and transformed into *E. coli* strain BL21(DE3) for protein expression. After inoculation into LB medium, two liters of culture was grown up to OD = 0.8 before induction with 0.2 mM IPTG. The culture was kept shaking at 16°C for 20 hours at 160 RPM before the harvest of the cells by centrifugation. The cell pellet was resuspended in lysis buffer (50 mM phosphate (pH 8.0), 300 mM NaCl, 10% glycerol, 5 mM β-mercaptoethanol) and lysed by sonication. After centrifugation at 20,000 rpm for 30 minutes at 4°C, the supernatant was filtered and then loaded onto HP Ni2+-NTA column (GE Healthcare). A stepped gradient (0 mM, 20 mM, 50 mM, and 100 mM imidazole) was employed for vigorous washing before elution with 500 mM imidazole-containing elution buffer. Fractions that contain the N-terminal (His)6-tagged PKS was applied onto the Superdex-200 gel-filtration column (GE Healthcare) for further purification. Fractions containing the bright yellow PKS protein were pooled and concentrated. The final protein concentration was determined by Bradford method and the protein solution was flash frozen in liquid nitrogen and stored in -80°C freezer.

**Cloning, expression and purification of the thioesterases CalE7, DynE7 and SgcE10.** The preparation of CalE7 and SgcE7 has been described somewhere else4, 5. The gene encoding DynE7 was cloned into pCDF plasmid for protein expression. The expression and purification were similar to the procedure described above for CalE8. Upon induction with 0.6 mM IPTG at OD 0.6, the culture was kept shaking at 160 RPM for 20 hours at 16°C. The harvested cells were lysed in buffer containing 50 mM phosphate buffer (pH 8.0), 300 mM NaCl, 10% glycerol and 5 mM β-ME. Ni2+-NTA purification and gel-filtration were carried out sequentially to yield the colorless tetrameric protein. The final protein concentration was determined by Bradford method before the concentrated protein solution was flash frozen in liquid nitrogen and stored in -80°C freezer.

**Enzymatic activity assay and product analysis**. A typical reaction mixture includes 1 µL of PKS (14 mg/mL), 2.5 µL of TE (25.2 mg/mL), 2.5 µL of NADPH (10 mM) and 91.5 µL of buffer [100 mM phosphate (pH 6.5, 7.0, 7.5, 8.0) or Tris (pH 8.5), or CHES (pH9.0), 300 mM NaCl and 1 mM DTT]. After gentle mixing, the reaction was incubated in the sample chamber of UV-Vis spectrophotometer for 15 minutes prior to the addition of 2.5 µL malonyl CoA (10 mM). The malonyl CoA/NADPH concentration dependent reactions were done at constant NADPH/malonyl CoA concentration, with varying malonyl COA/NADPH concentration of 100, 250, 500, 1000 and 1500 μM. The reactions were carried out at pH 8.2, 30 oC for 3 hours. At the end of 3 hours, the reaction was then quenched with the addition of HCl to bring the pH to ~2. An equal volume of ethyl acetate was added into the reaction mixture and vigorous vortexing ensued. Subsequently the reaction mixture was centrifuged at 15,000 RPM for 15 minutes. The organic solvent layer was then pipetted out and the reaction mixture was subject to extraction for the second time. The ethyl acetate extracts were pooled and the solvent was evaporated using a Speed-Vac. The yellow pigment was re-dissolved in a small volume of methanol for HPLC analysis using an eclipse XDB RP C18 column (4.6 × 250mm). The gradient employed was from 70% buffer A (HPLC grade water with 0.045% TFA) + 30% buffer B (100% acetonitrile with 0.045% TFA) to 100% buffer B in 60 minutes.

Experimental conditions for the enzymatic assays in Fig. 3. Fig. 3A. 3.1 μM SgcE, 62.9 μM SgcE10, 0.25 mM NADPH, 0.25 mM malonyl-CoA, Tris (pH 7.0), 23°C. Fig. 3B. 3.1 μM SgcE, 62.9 μM SgcE10, 0.075 mM NADPH, 1.4 mM malonyl-CoA, Tris (pH 8.5), 23°C. Fig. 3C. 0.33 μM CalE8, 8.7 µM CalE7, 0.25 mM NADPH, 0.25 mM malonyl CoA, Tris (pH 7.0) 23 oC. Fig. 3D. 0.33 μM CalE8, 8.7 µM CalE7, 0.25 mM NADPH, 2.4 mM malonyl CoA, Tris (pH 8.5) 37 oC. Fig. 3E. 3.2 μM DynE8, 66.8 μM DynE7, 0.35 mM NADPH, 0.25 mM malonyl-CoA, pH 7.0, 23°C. Fig. 3F. 3.2 μM DynE8, 66.8 μM DynE7, 0.15 mM NADPH, 1.4 mM malonyl-CoA, Tris (pH 8.5), 37°C.

**LC-MS.** The column used for LC-MS analysis was eclipse XDB C18 column with a dimension of 2.3 × 150mm. The gradient employed in the analysis was from 70% buffer A (HPLC grade water with 0.045% TFA) + 30% buffer B (100% acetonitrile with 0.045% TFA) to 100% buffer B in 120 minutes. The ionization energy was set at 5.0 kV with an ESI or APCI ionization source for the Finnigan LTQ Orbitrap mass spectrometer (Thermo Electron). The result was analyzed with the software Xcalibur for the determination of plausible molecular compositions based on the observed molecular weight and fragmentation pattern.

**Synthesis of (3E,5E,7E,9E,11E,13E)-Pentadeca-3,5,7,9,11,13-hexaen-2-one (3)** The synthesis of the **3** was designed based on the procedures reproted for similar compounds in the literature6-9.

**(2E,4E,6E)-Octa-2,4,6-trien-1-ol (9)6.** To a suspension of NaH (60% in mineral oil, 400 mg, 10 mmol) in THF (50 ml) at 0 °C was slowly added the phosphonate (2.24 g, 10 mmol). After the addition, the suspension turned clear. The aldehyde (808 mg, 8 mmol) in THF (15 ml) was added. The reaction mixture was stirred at 0 °C for 2 h before being quenched by saturated NH4Cl (50 ml). The product was extracted with ethyl acetate (3 x 70 ml). The combined extracts were washed with brine, dried and concentrated. The white solid (1.32 g) was pure enough and used in the next step. To a suspension of LiAlH4 (608 mg ,16 mmol) in anhydrous THF (100 ml) at 0 °C, the ester (1.32 g , 8 mmol) in 50 ml of THF was added dropwise. After the addition, the mixture was allowed to stirred at room temperature for 2 h , monitored with TLC, then quenched by 20 ml of 1N NaOH, The mixture was stirred for 1 h at room temperature, then the white precipitate was removed by filtration through a celite pad and the pad was rinsed with 3 x 30 ml of ethyl acetate (EA). The combined organic filtrates were washed with 100 ml of brine, and the aqueous layer was extracted with diethyl ether (3 × 30 ml). The combined organic phases were dried with anhydrous sodium sulfate and concentrated, the residue was purified by silica gel column chromatography to afford 910 mg white solid, yield 91%. **1H NMR (CDCl3, 400 MHz).** δ1.35 (s, 1H), 1.77 (d, J = 6.8 Hz, 3H), 4.18 (d, J = 6.8 Hz, 2H), 5.69-5.83 (m, 2H), 6.05-6.28 (m, 4H) **13C NMR (CDCl3, 100 MHz)** δ18.3, 63.5, 129.3, 130.5, 131.0, 131.5, 131.9, 133.6.

**1H NMR spectrum of 9**

**
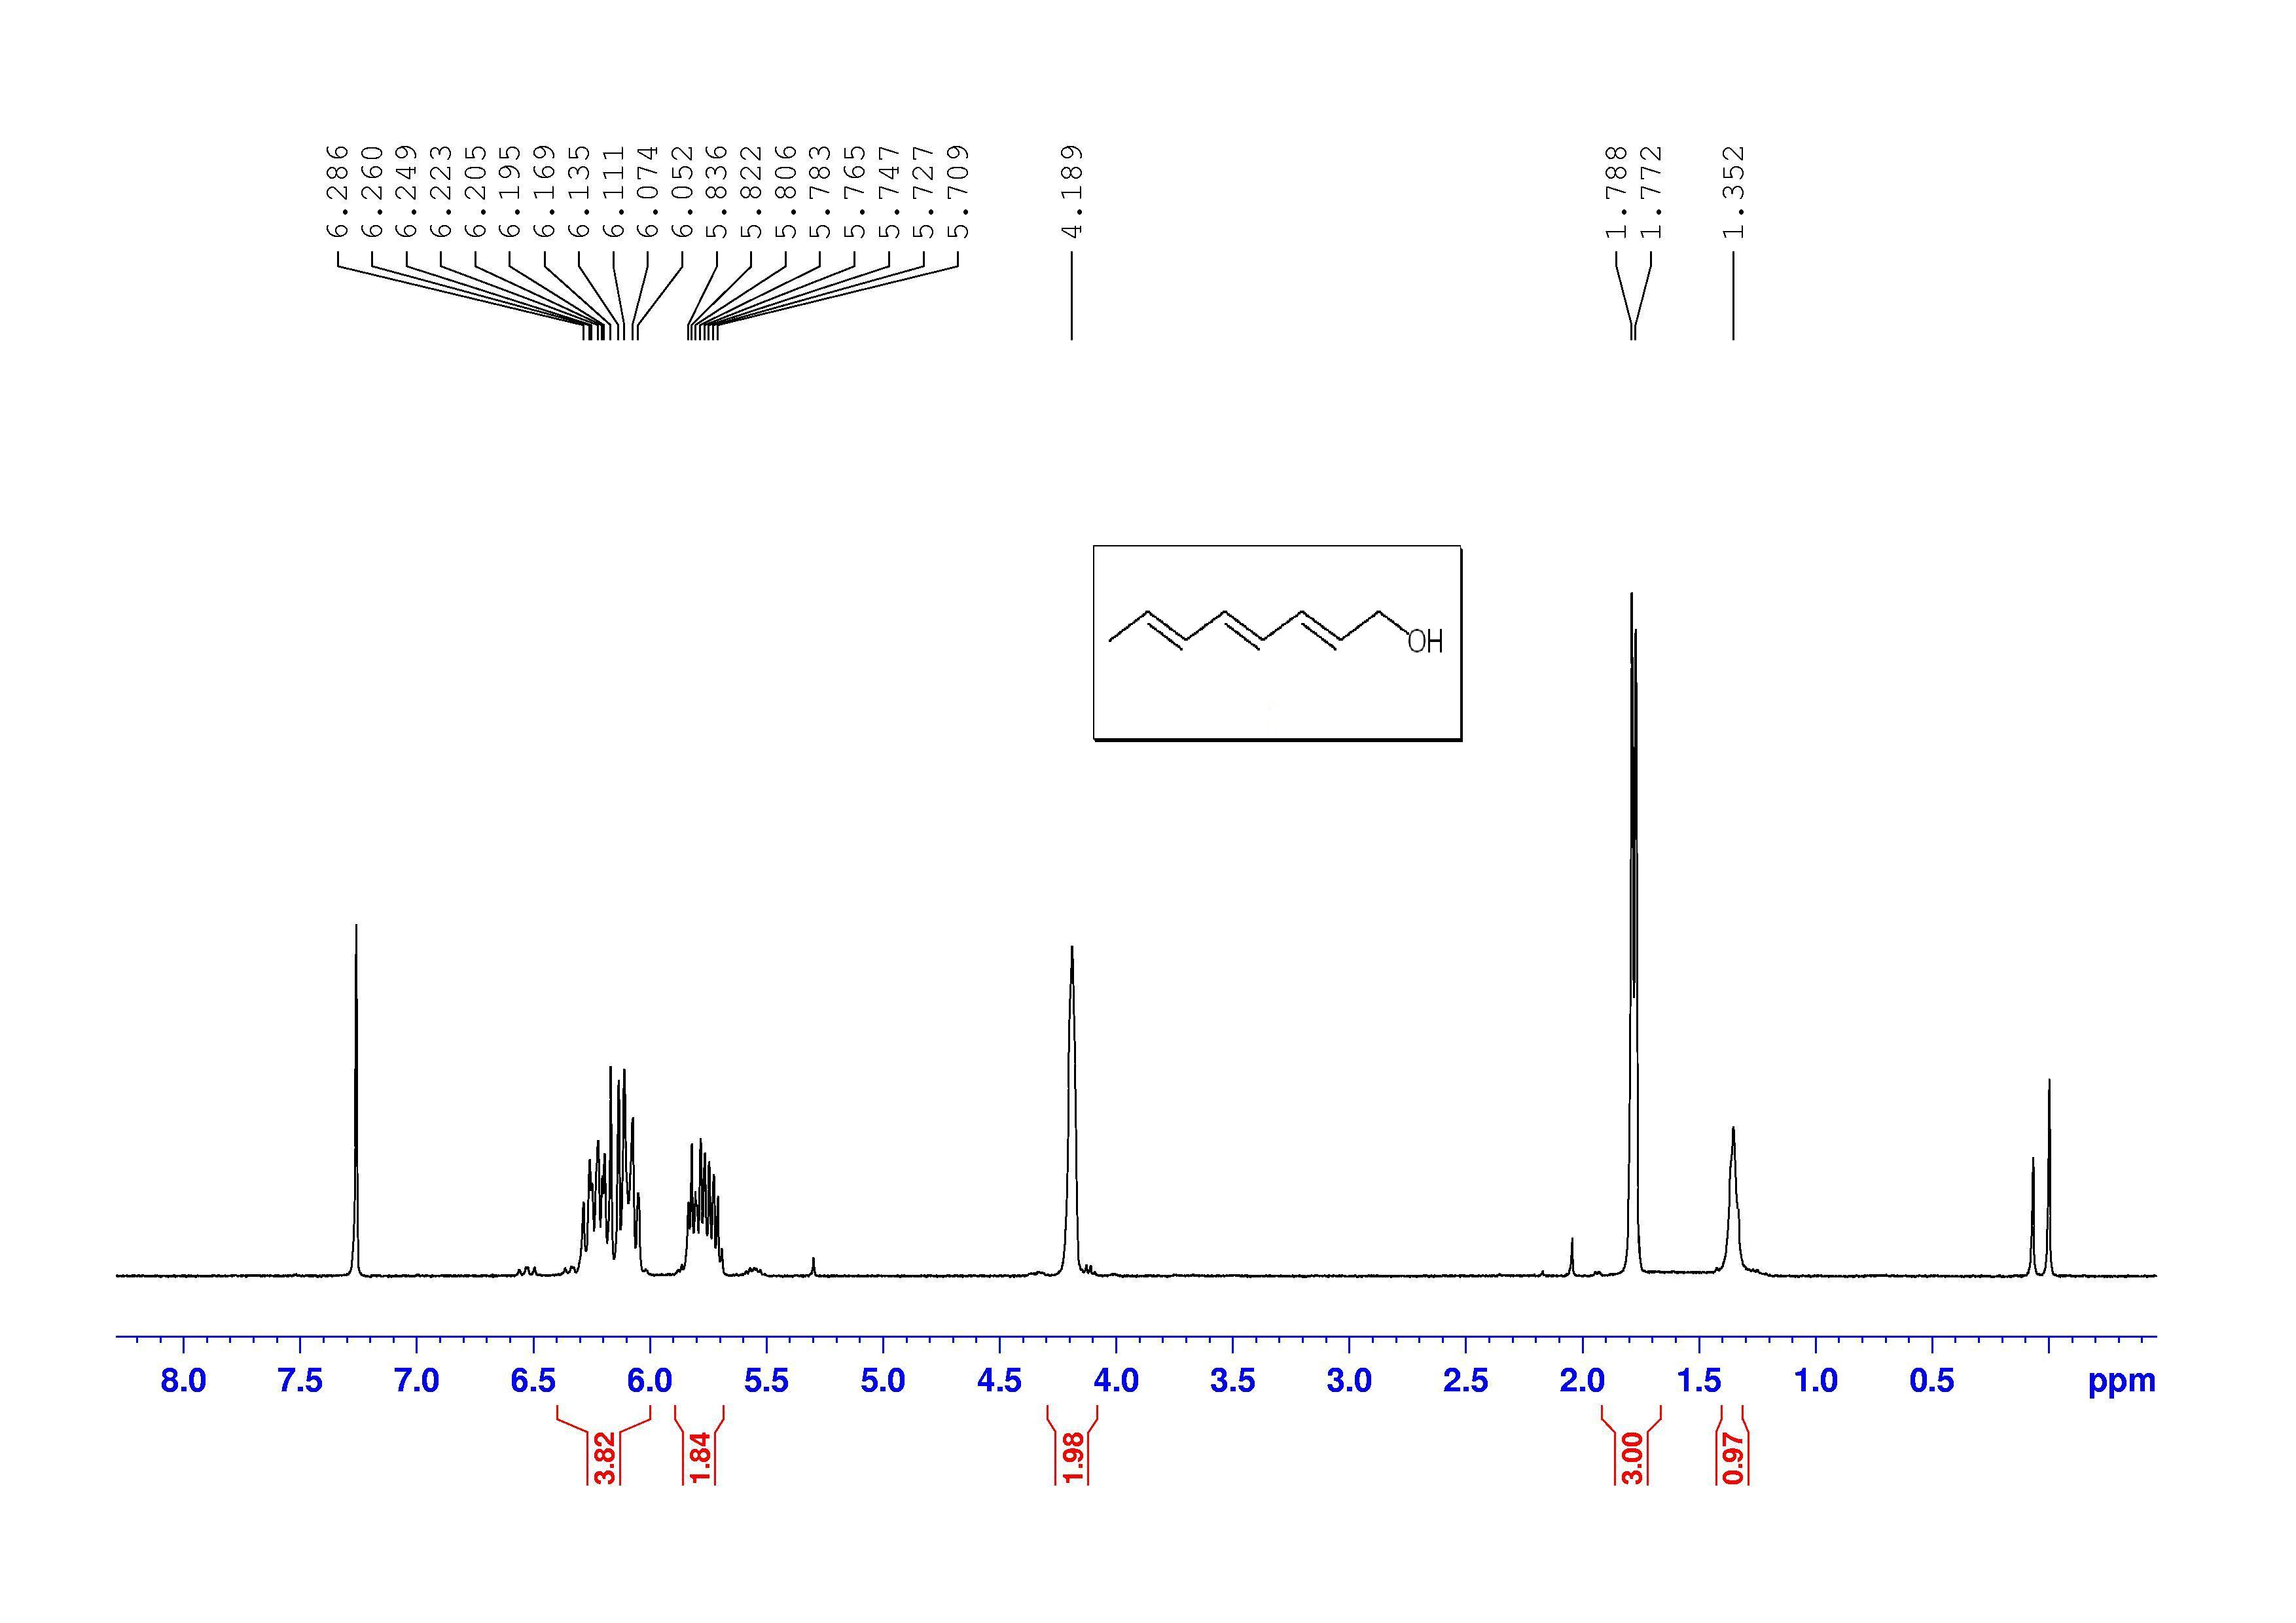
**

**13C NMR spectrum of 9**

**
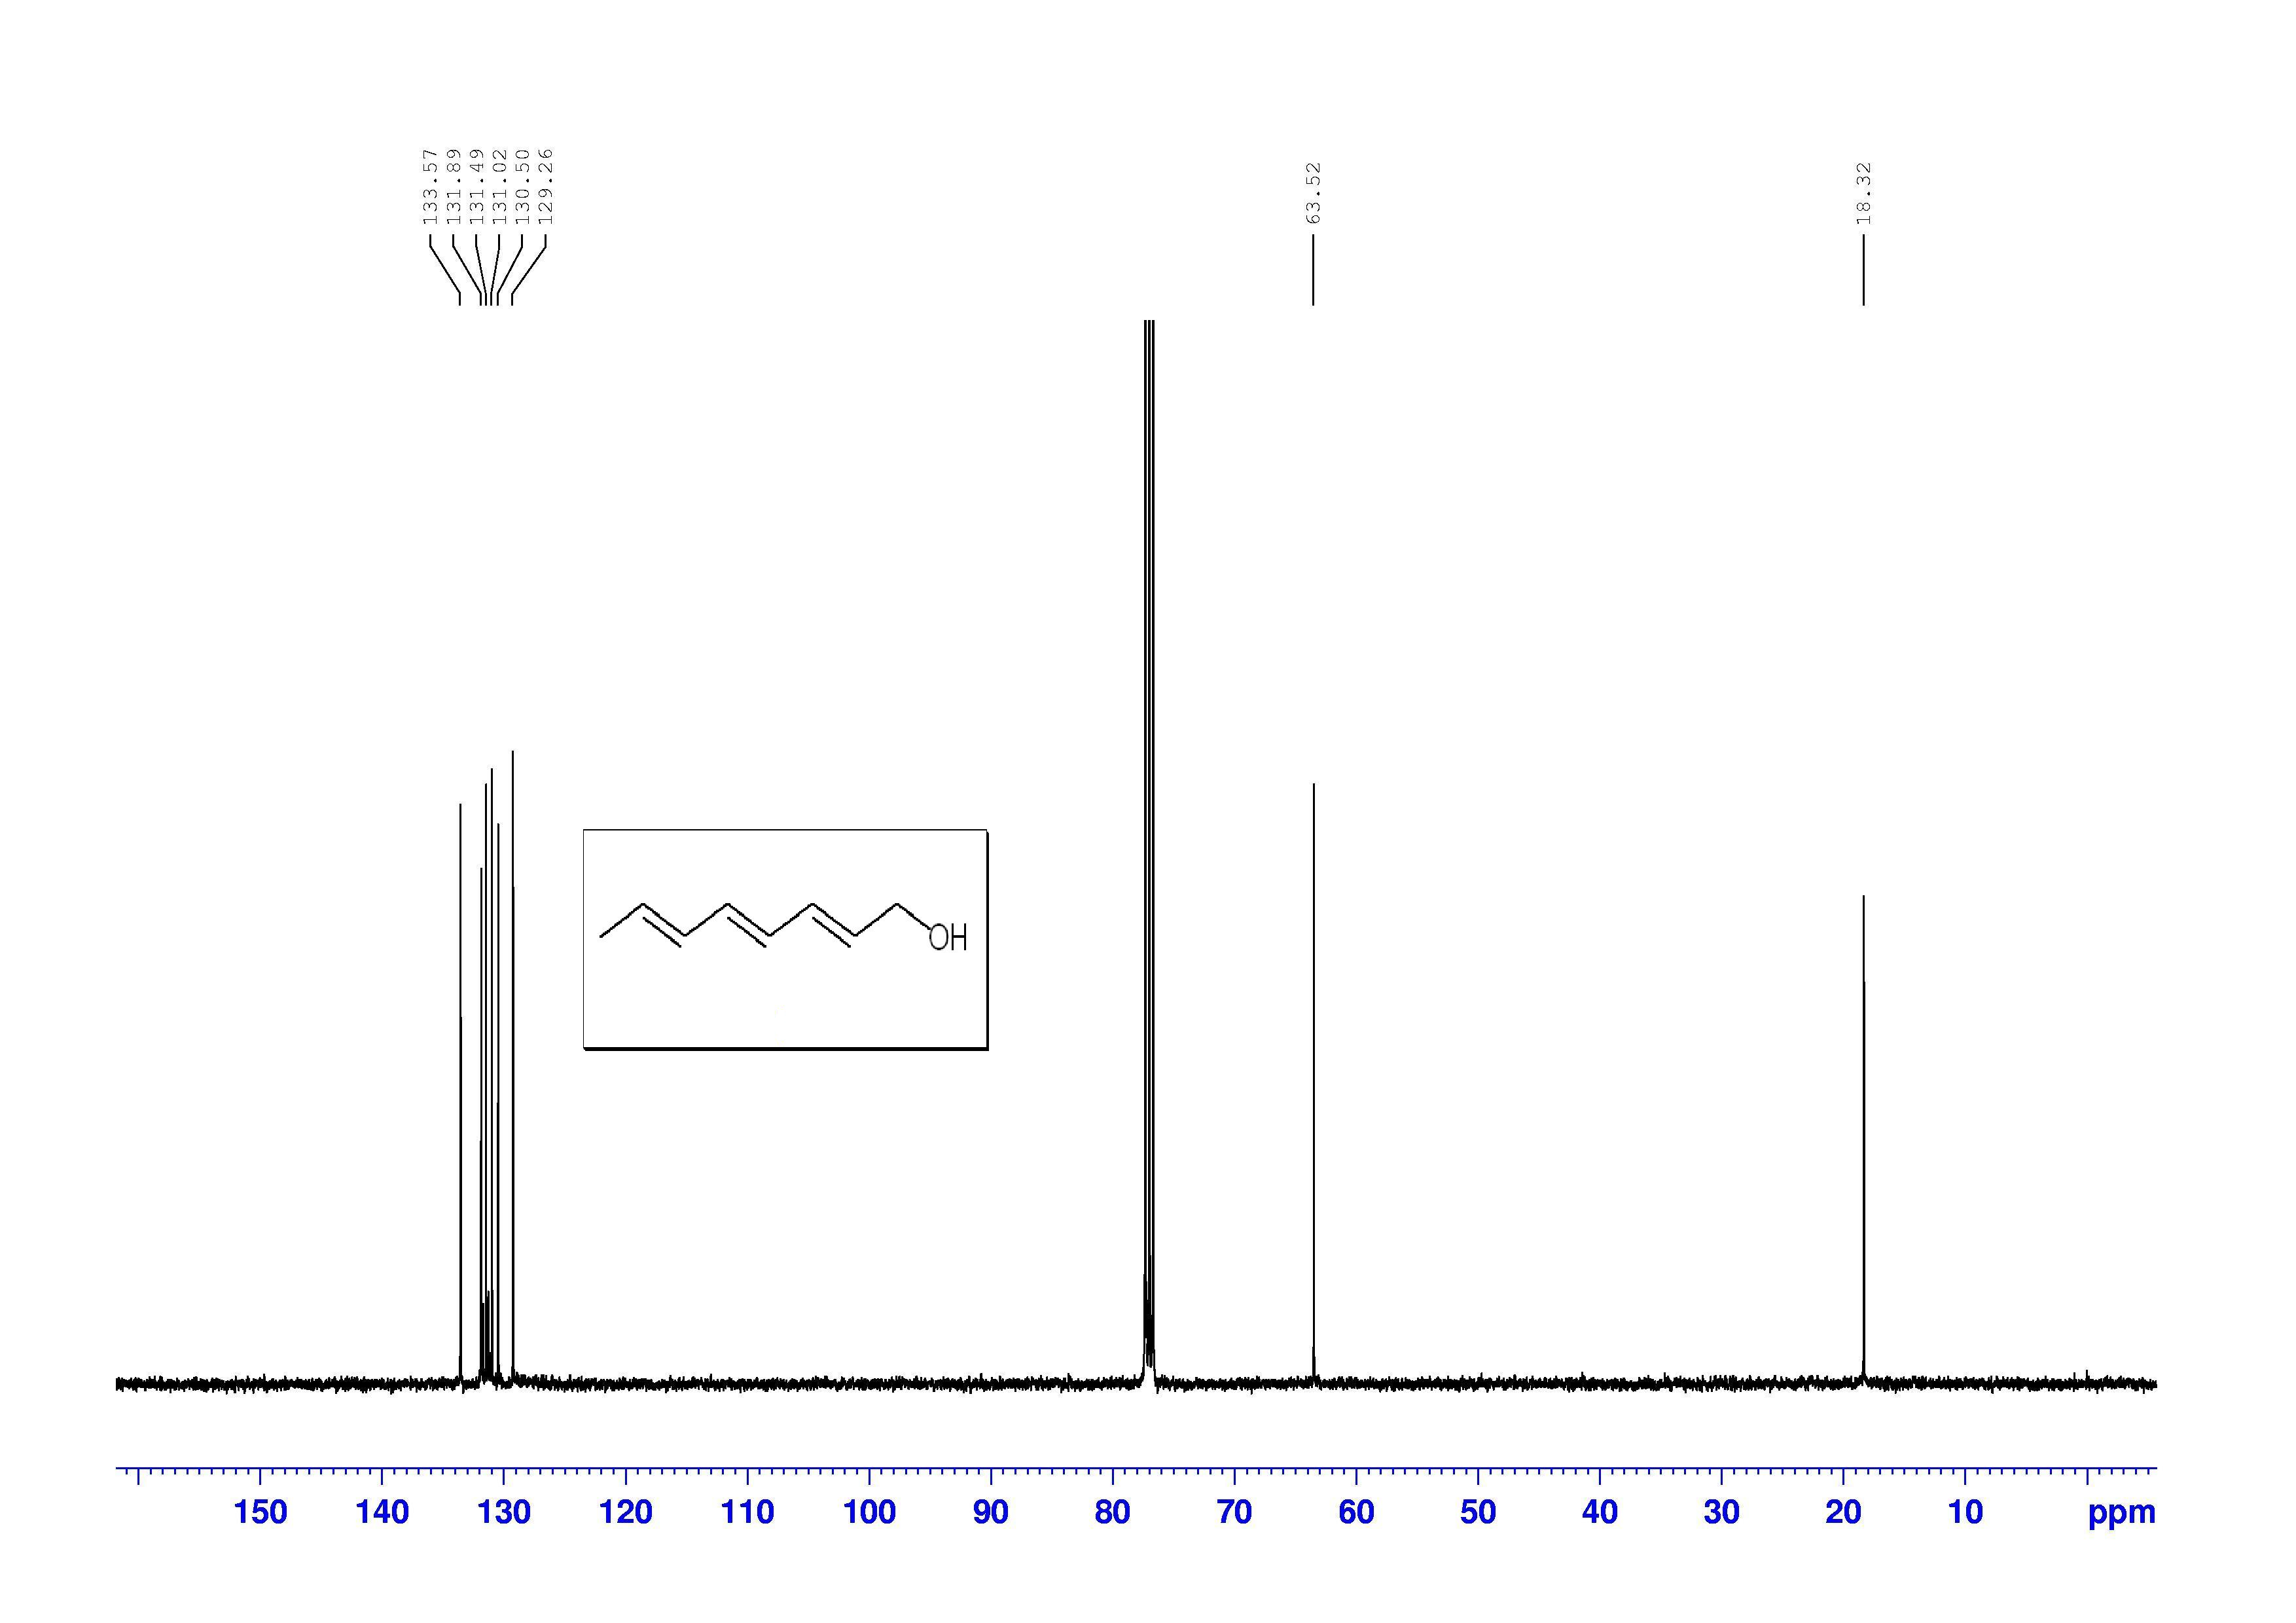
**

**(2E,4E,6E)-Octa-2,4,6-trienal (10)7.** To a solution of alcohol **9** (500 mg, 4.0 mmol) in 50 ml of EA was added IBX (3.42 g, 12 mmol) in one portion, the mixture was refluxed for 3 h and then cooled to room temperature, then the white precipitate was removed by filtration through a celite pad and the pad was rinsed with 3 x 20 ml of EA, The combined organic filtrates were concentrated, the residue was purified by silica gel column chromatography to afford 418 mg solid, yield 86%. **1H NMR (CDCl3, 400 MHz).** δ1.86 (d, J = 6.8 Hz, 3H), 6.01-6.17 (m, 3H) , 6.30-6.36 (m, 1H), 6.60-6.64 (m, 1H), 7.08-7.26 (m, 1H) , 9.54 (d, J = 8 Hz, 1H). **13C NMR (CDCl3, 100 MHz)** δ18.7, 127.6, 130.7, 131.2, 137.2, 143.1, 152.5, 193.6

**1H NMR spectrum of 10**

**
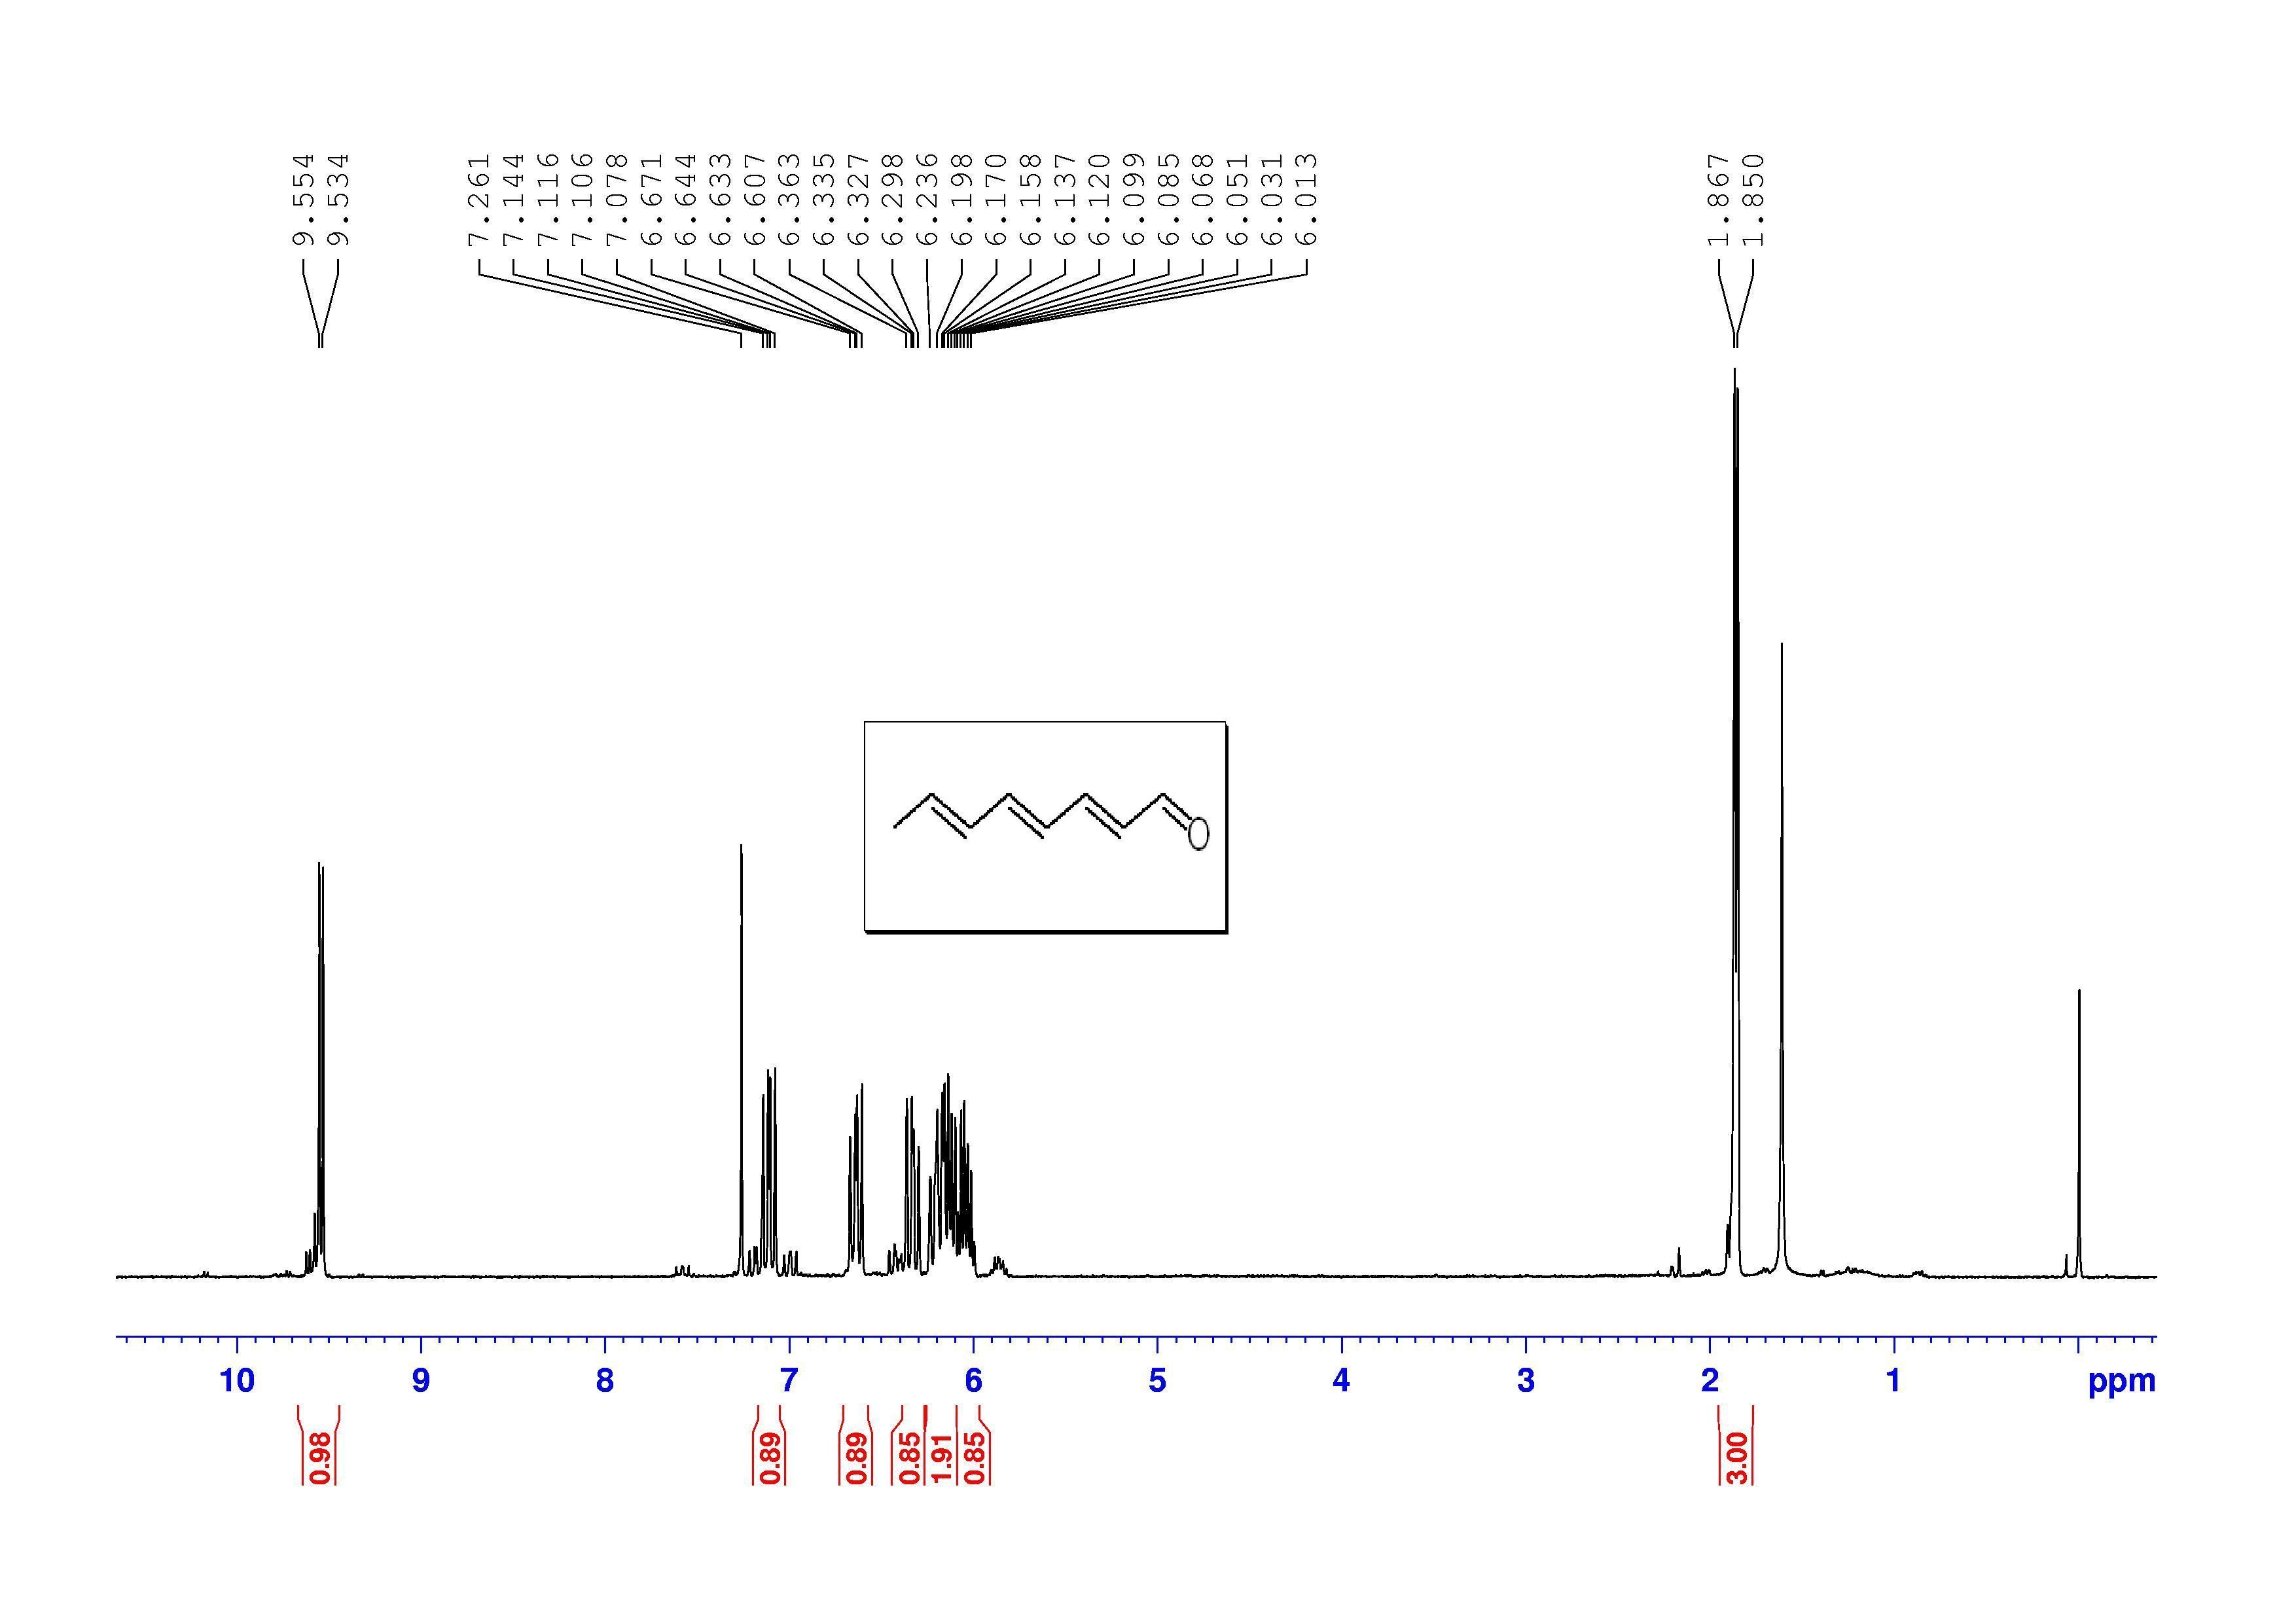
**

**13C NMR spectrum of 10**

**
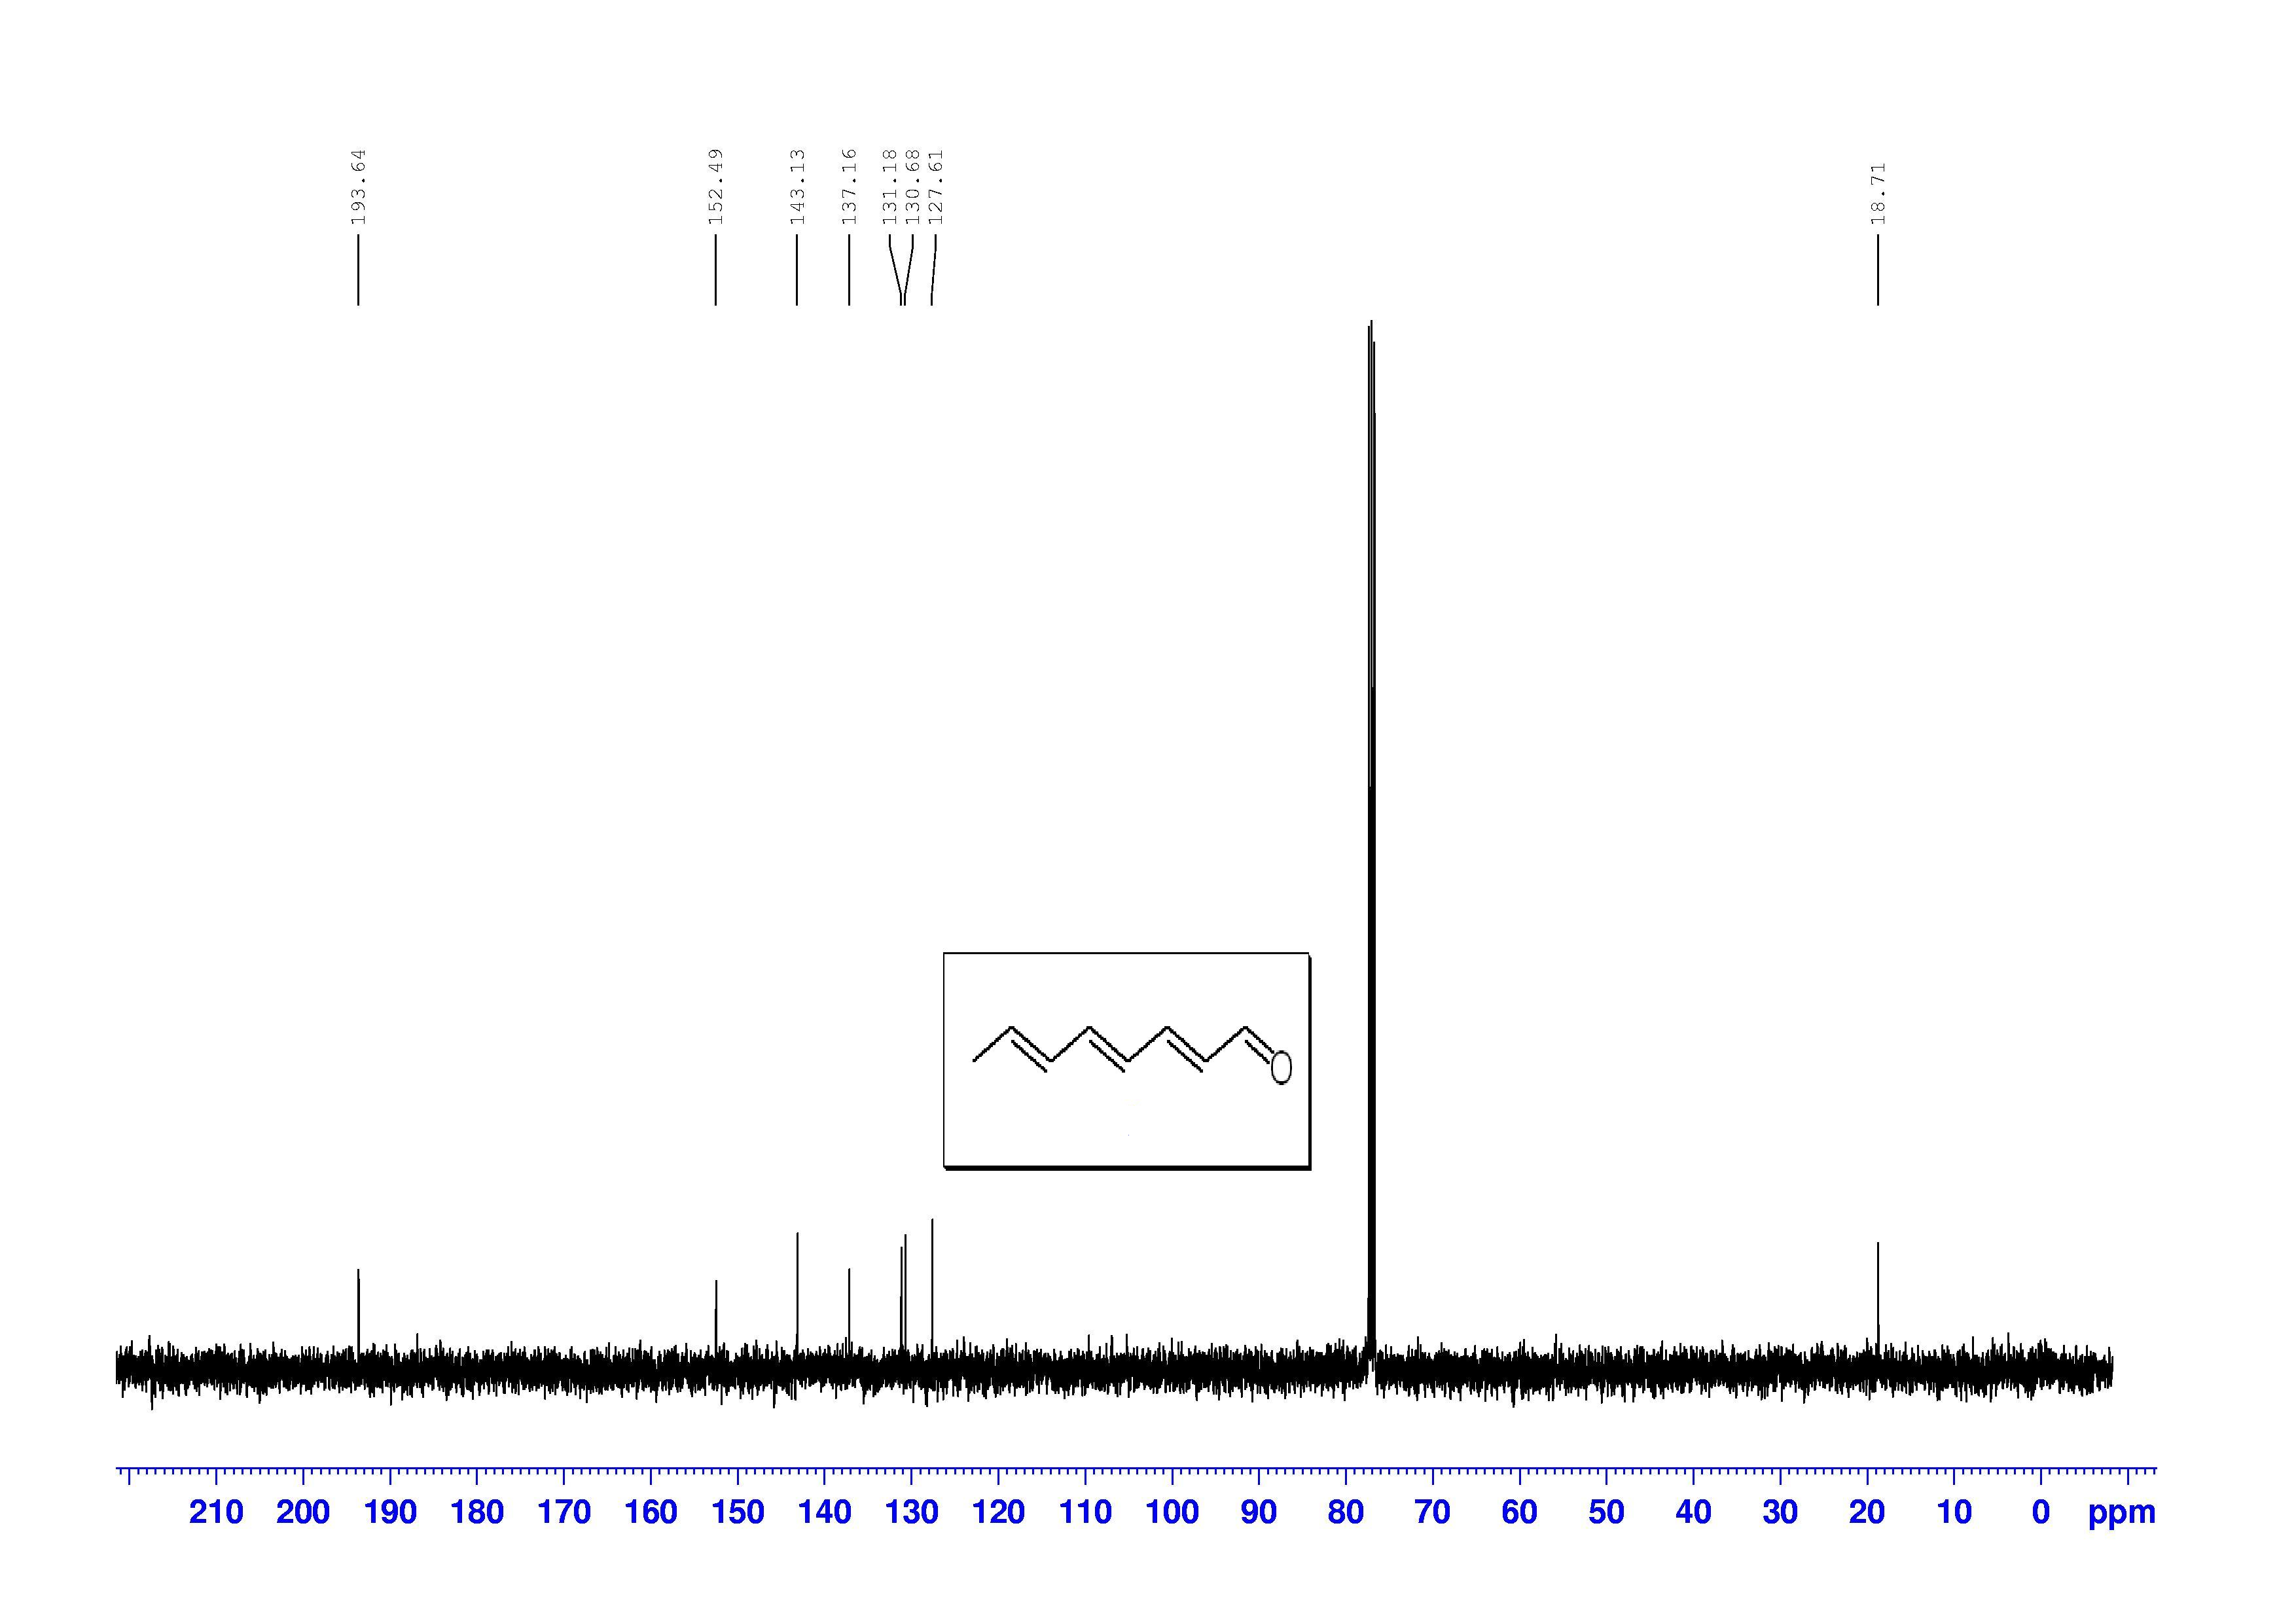
**

**(2E,4E,6E,8E,10E)-Ethyl dodeca-2,4,6,8,10-pentaenoate (11)8.** To a suspension of NaH (60% in mineral oil, 160 mg, 4 mmol) in THF (30 ml) at 0 °C was slowly added the phosphonate (1.0 g, 4.0 mmol). After the addition, the suspension turned clear. The aldehyde **10** (244 mg, 2.0 mmol) in THF (15 ml) was added dropwise. The reaction mixture was stirred at 0 °C for 2 h before being quenched by saturated NH4Cl (50 ml). The product was extracted with ethyl acetate (3 x 70 ml). The combined extracts were washed with brine, dried and concentrated. the residue was purified by silica gel column chromatography to afford 418 mg yellowish solid 313 mg, yield 72% . **1H NMR (CDCl3, 400 MHz).** δ1.29 (t, J = 7.2 Hz, 3H), 1.83 (dd, J1 = 6.8 Hz, J2 = 15.2 Hz, 3H), 4.20 (q, J = 7.2 Hz, 2H), 5.78-5.86 (m, 1H), 6.09-6.44 (m, 7H) , 6.55-6.59 (m, 1H) 6.60-6.63 (m, 1H), 7.26-7.34 (m, 1H). **13C NMR (CDCl3, 100 MHz)** δ14.3, 18.5, 60.2, 120.3, 129.4, 130.0, 131.0, 131.8, 132.1, 135.9, 137.5, 140.9, 144.5, 167.2.

**1H NMR spectrum of 11**

**
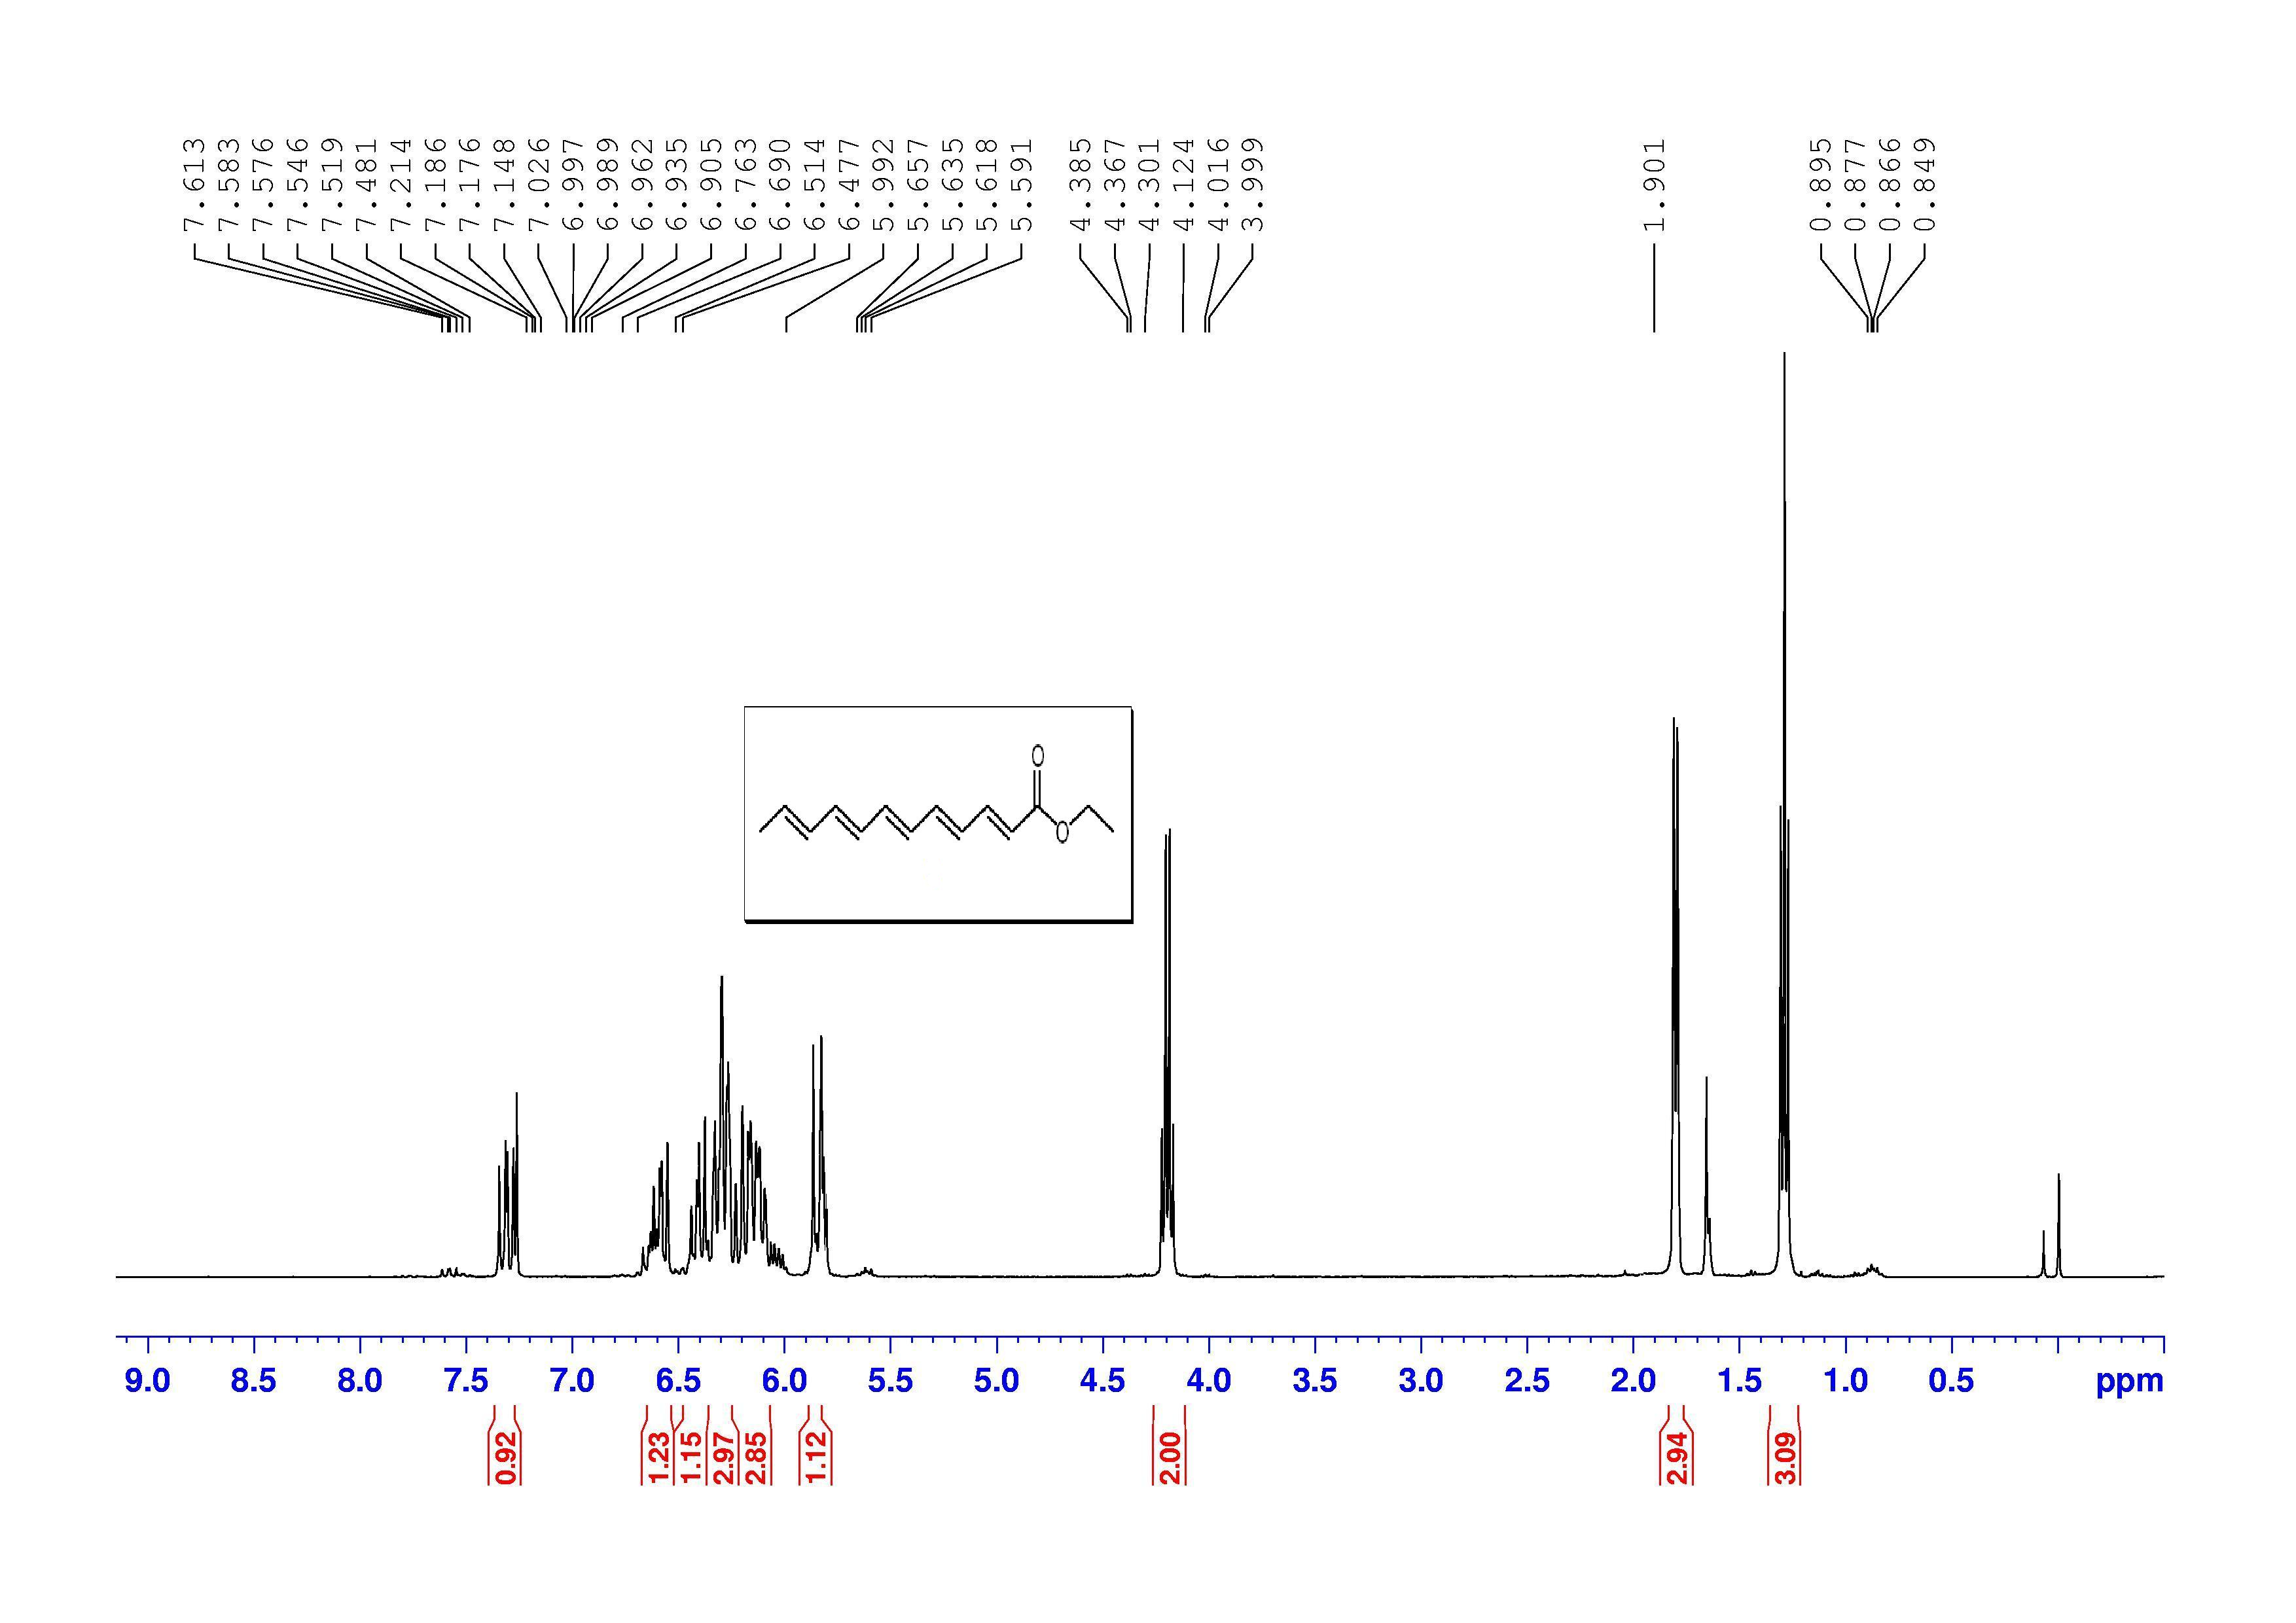
**

**13C NMR spectrum of 11**

**
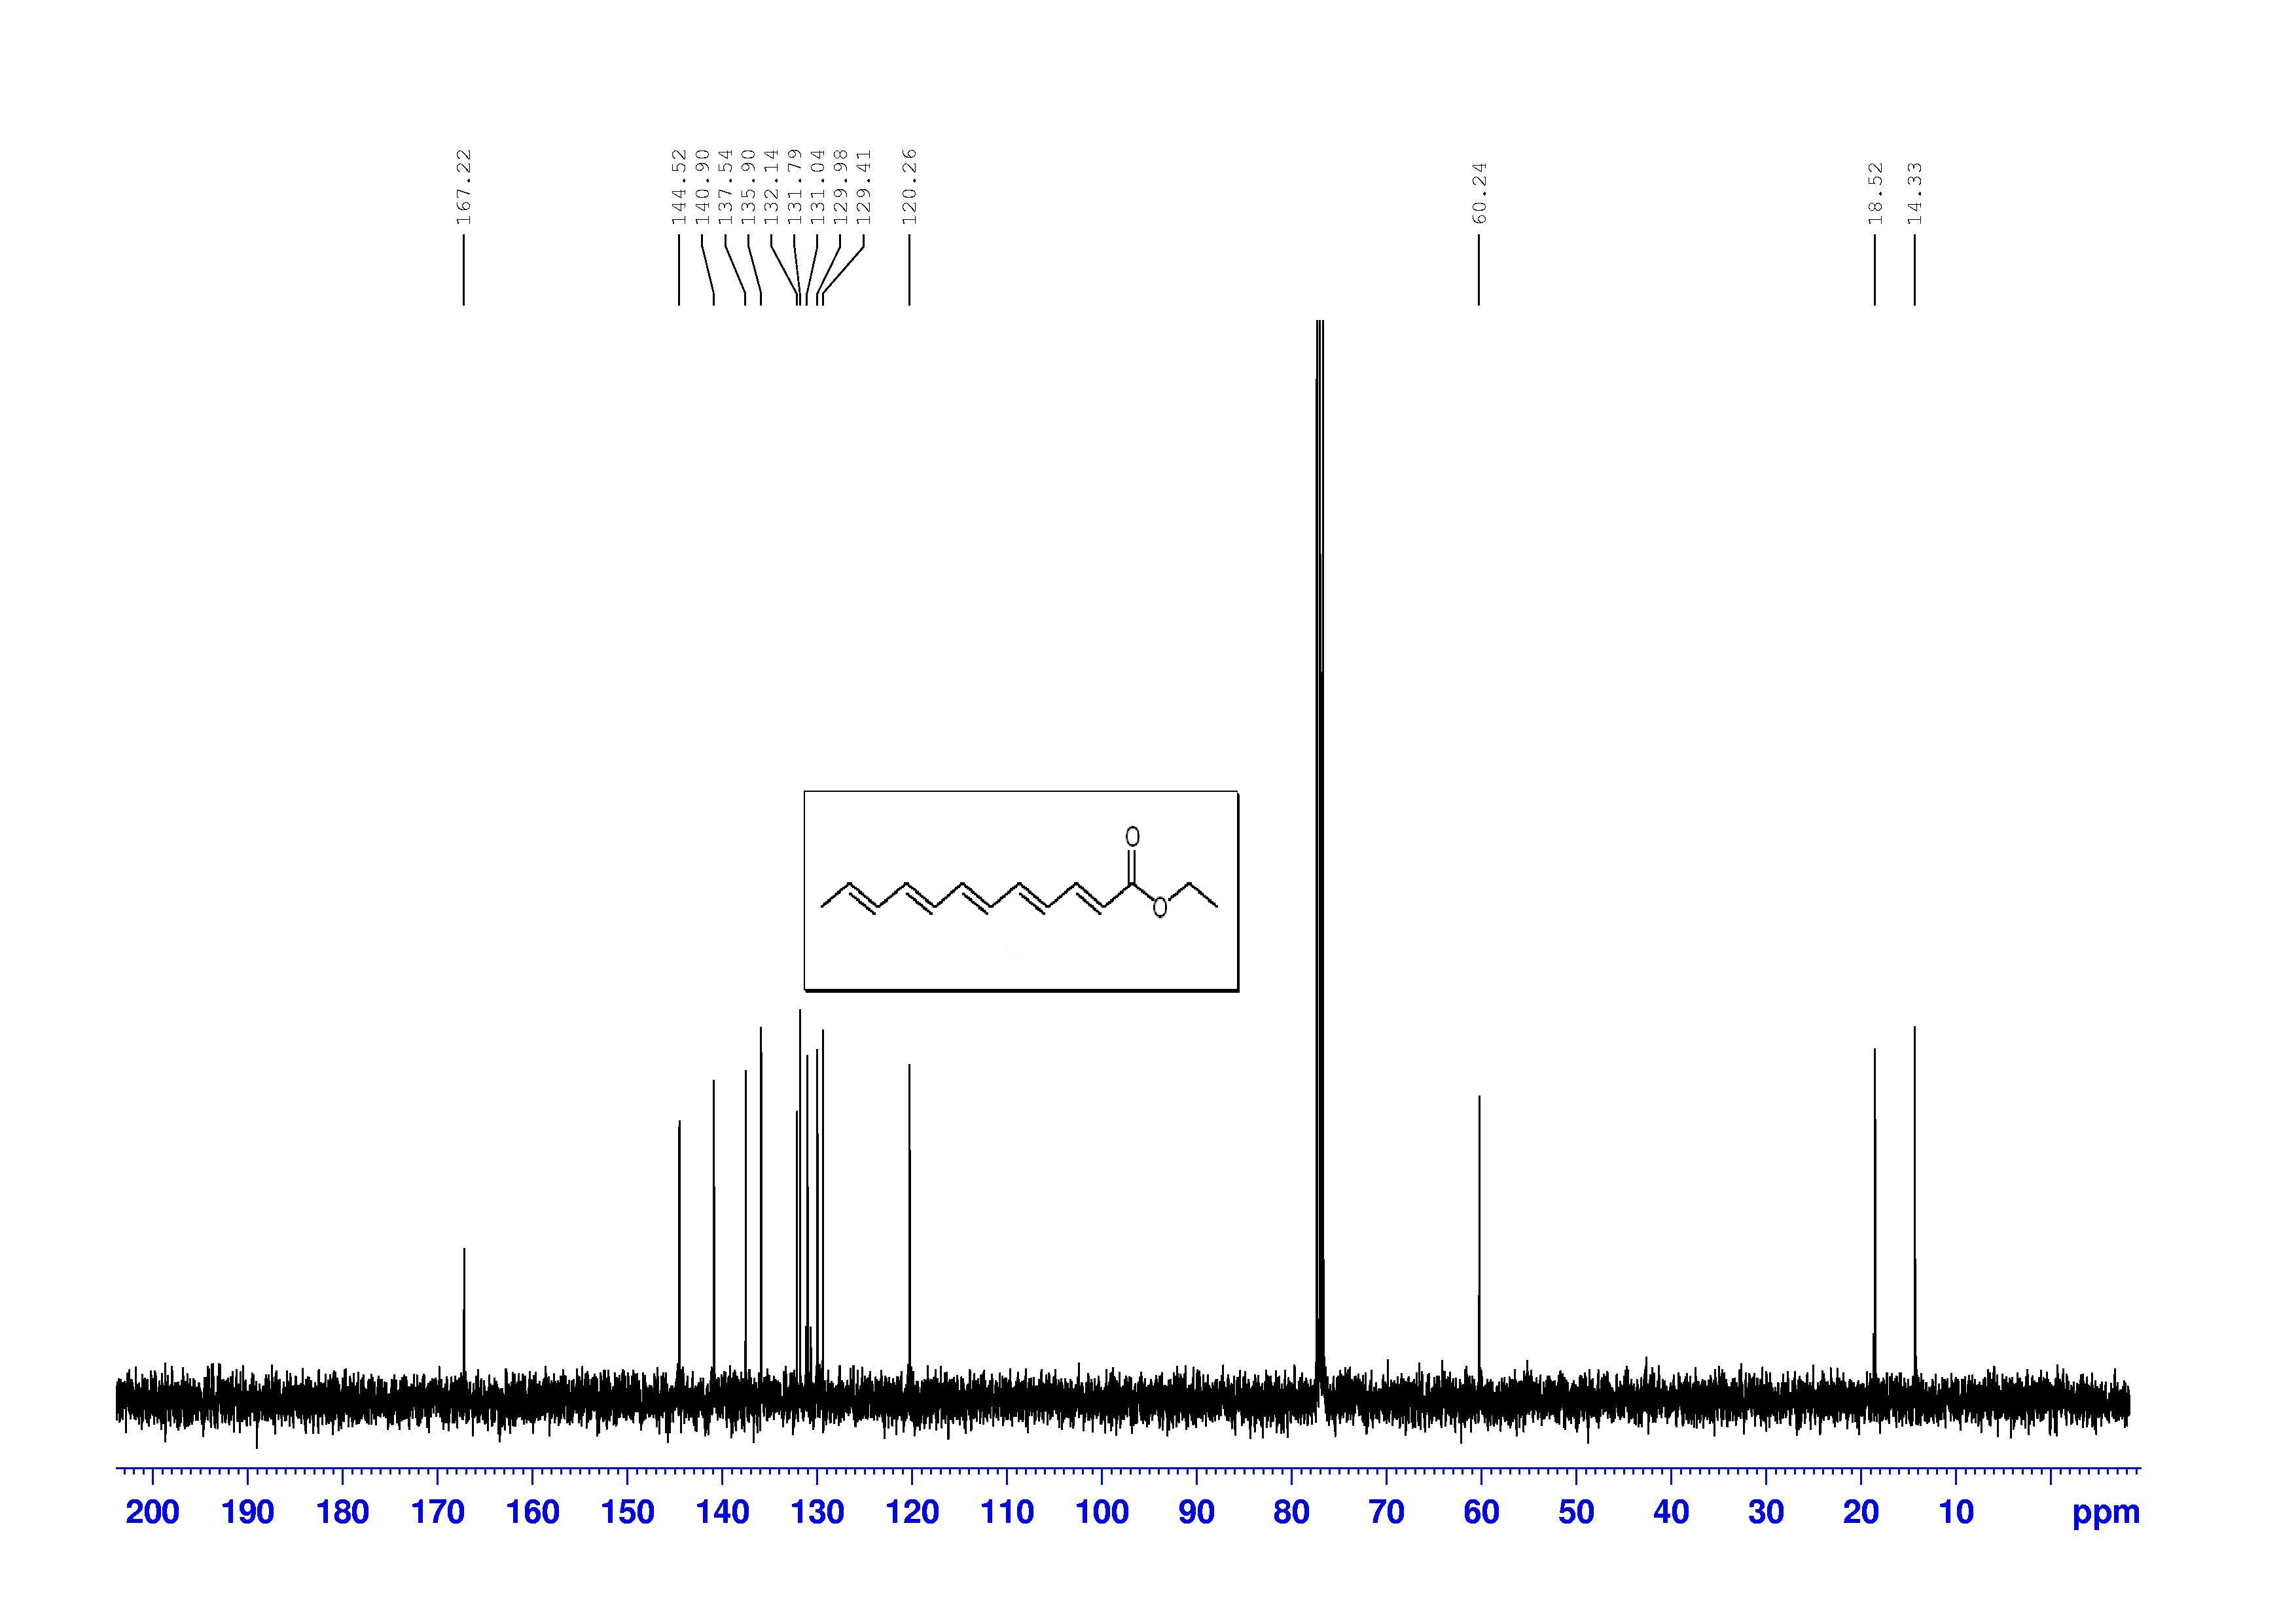
**

**(2E,4E,6E,8E,10E)-Dodeca-2,4,6,8,10-pentaenal (12)9.** To a solution of the ester **11** (218 mg, 1 mmol) in hexanes (10 ml) at -78 °C was added Dibal-H solution (1.0 M in hexanes, 2 ml). The reaction mixture was stirred for 30 min at -78 °C before being quenched with 5 ml of saturated Rochelle’s salt solution. The resultant mixture was stirred at room temperature for 1.5 h before diethyl ether (20 ml) was added. The organic layer was separated, dried and concentrated and used directly in the next step. To a solution of alcohol (80 mg, 0.5 mmol) in 20 ml of EA was added IBX (427 mg, 1.5 mmol) in one portion, the mixture was refluxed for 1 h and then cooled to room temperature, then the white precipitate was removed by filtration through a celite pad and the pad was rinsed with t3 x 20 ml of EA, The combined organic filtrates were concentrated, the residue was purified by silica gel column chromatography to afford 68 mg yellow solid, yield 88%. **1H NMR (CDCl3, 400 MHz).** δ1.82 (d, J = 6.8 Hz, 3H), 5.83-5.88 (m, 1H) ,6.12-6.53 (m, 7H), 6.68-6.74 (m, 1H), 7.11-7.26 (m, 1H) ,9.56 (d, J = 8 Hz, 1H). **13C NMR (CDCl3, 100 MHz)** δ18.6, 129.3, 129.8, 130.7, 130.7, 131.7,133.0, 137.0 139.3, 143.0, 152.0, 193.5.

**1H NMR spectrum of 12**

**
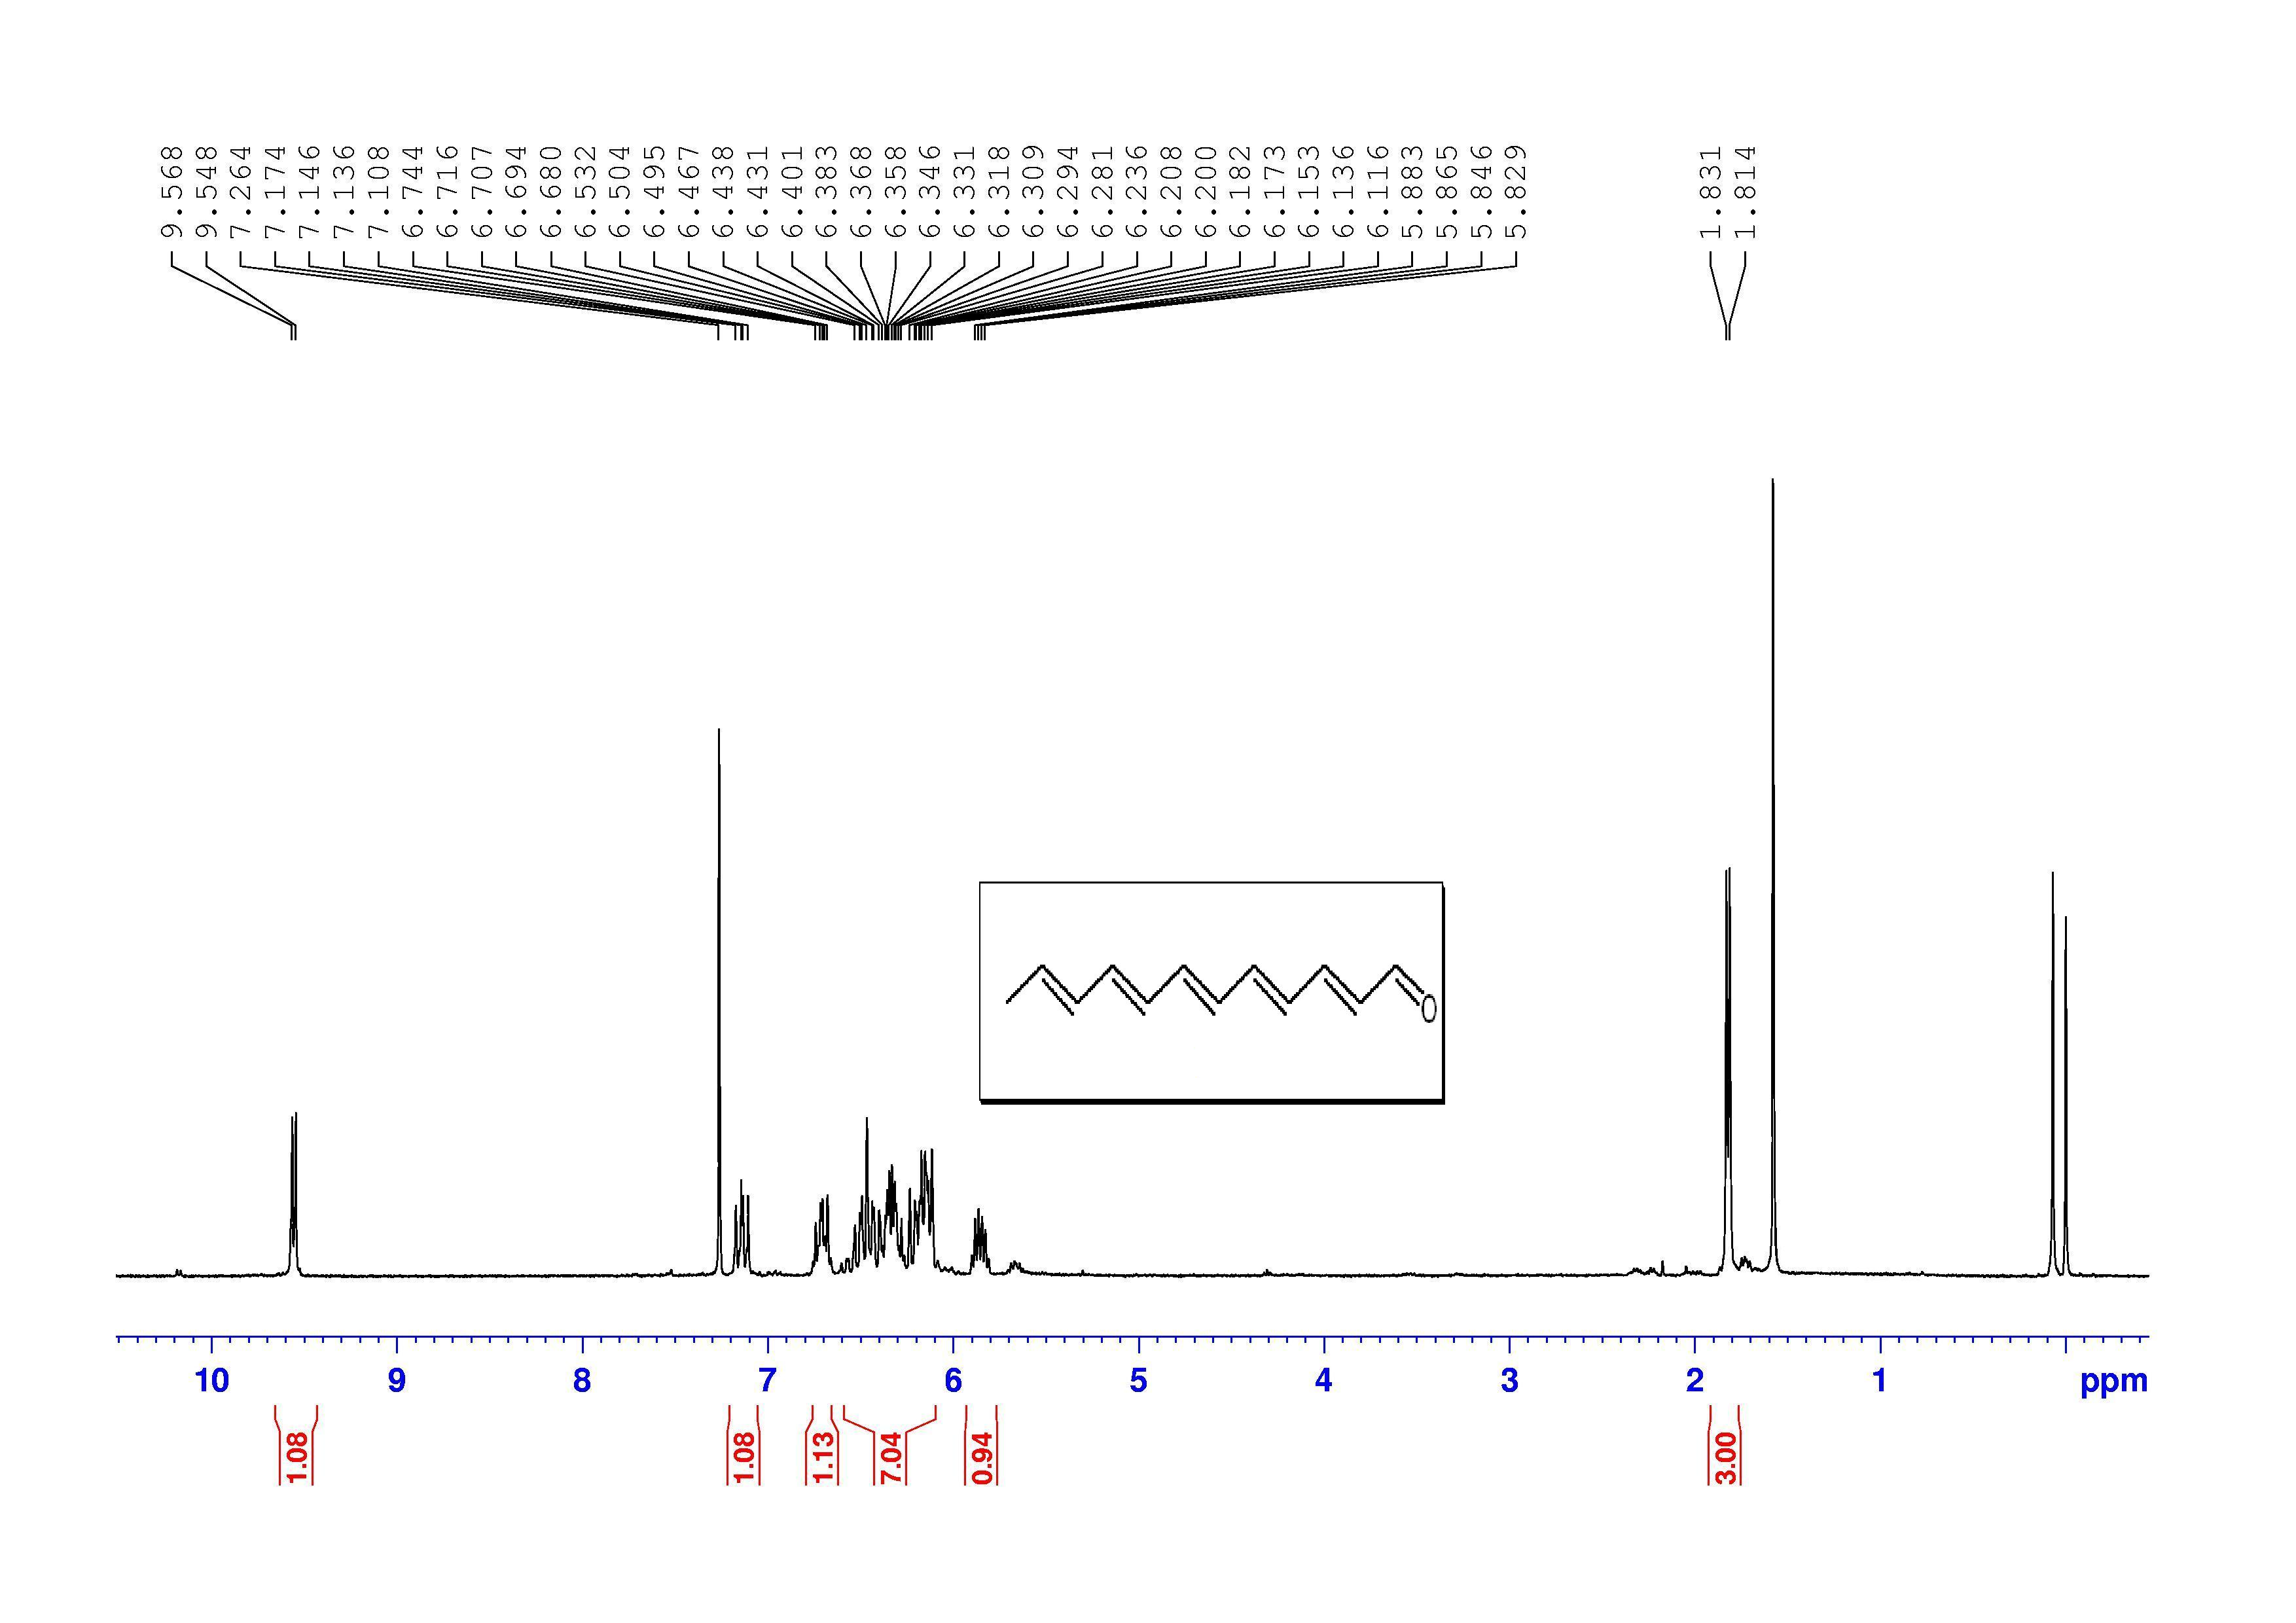
**

**13C NMR spectrum of 12**

**
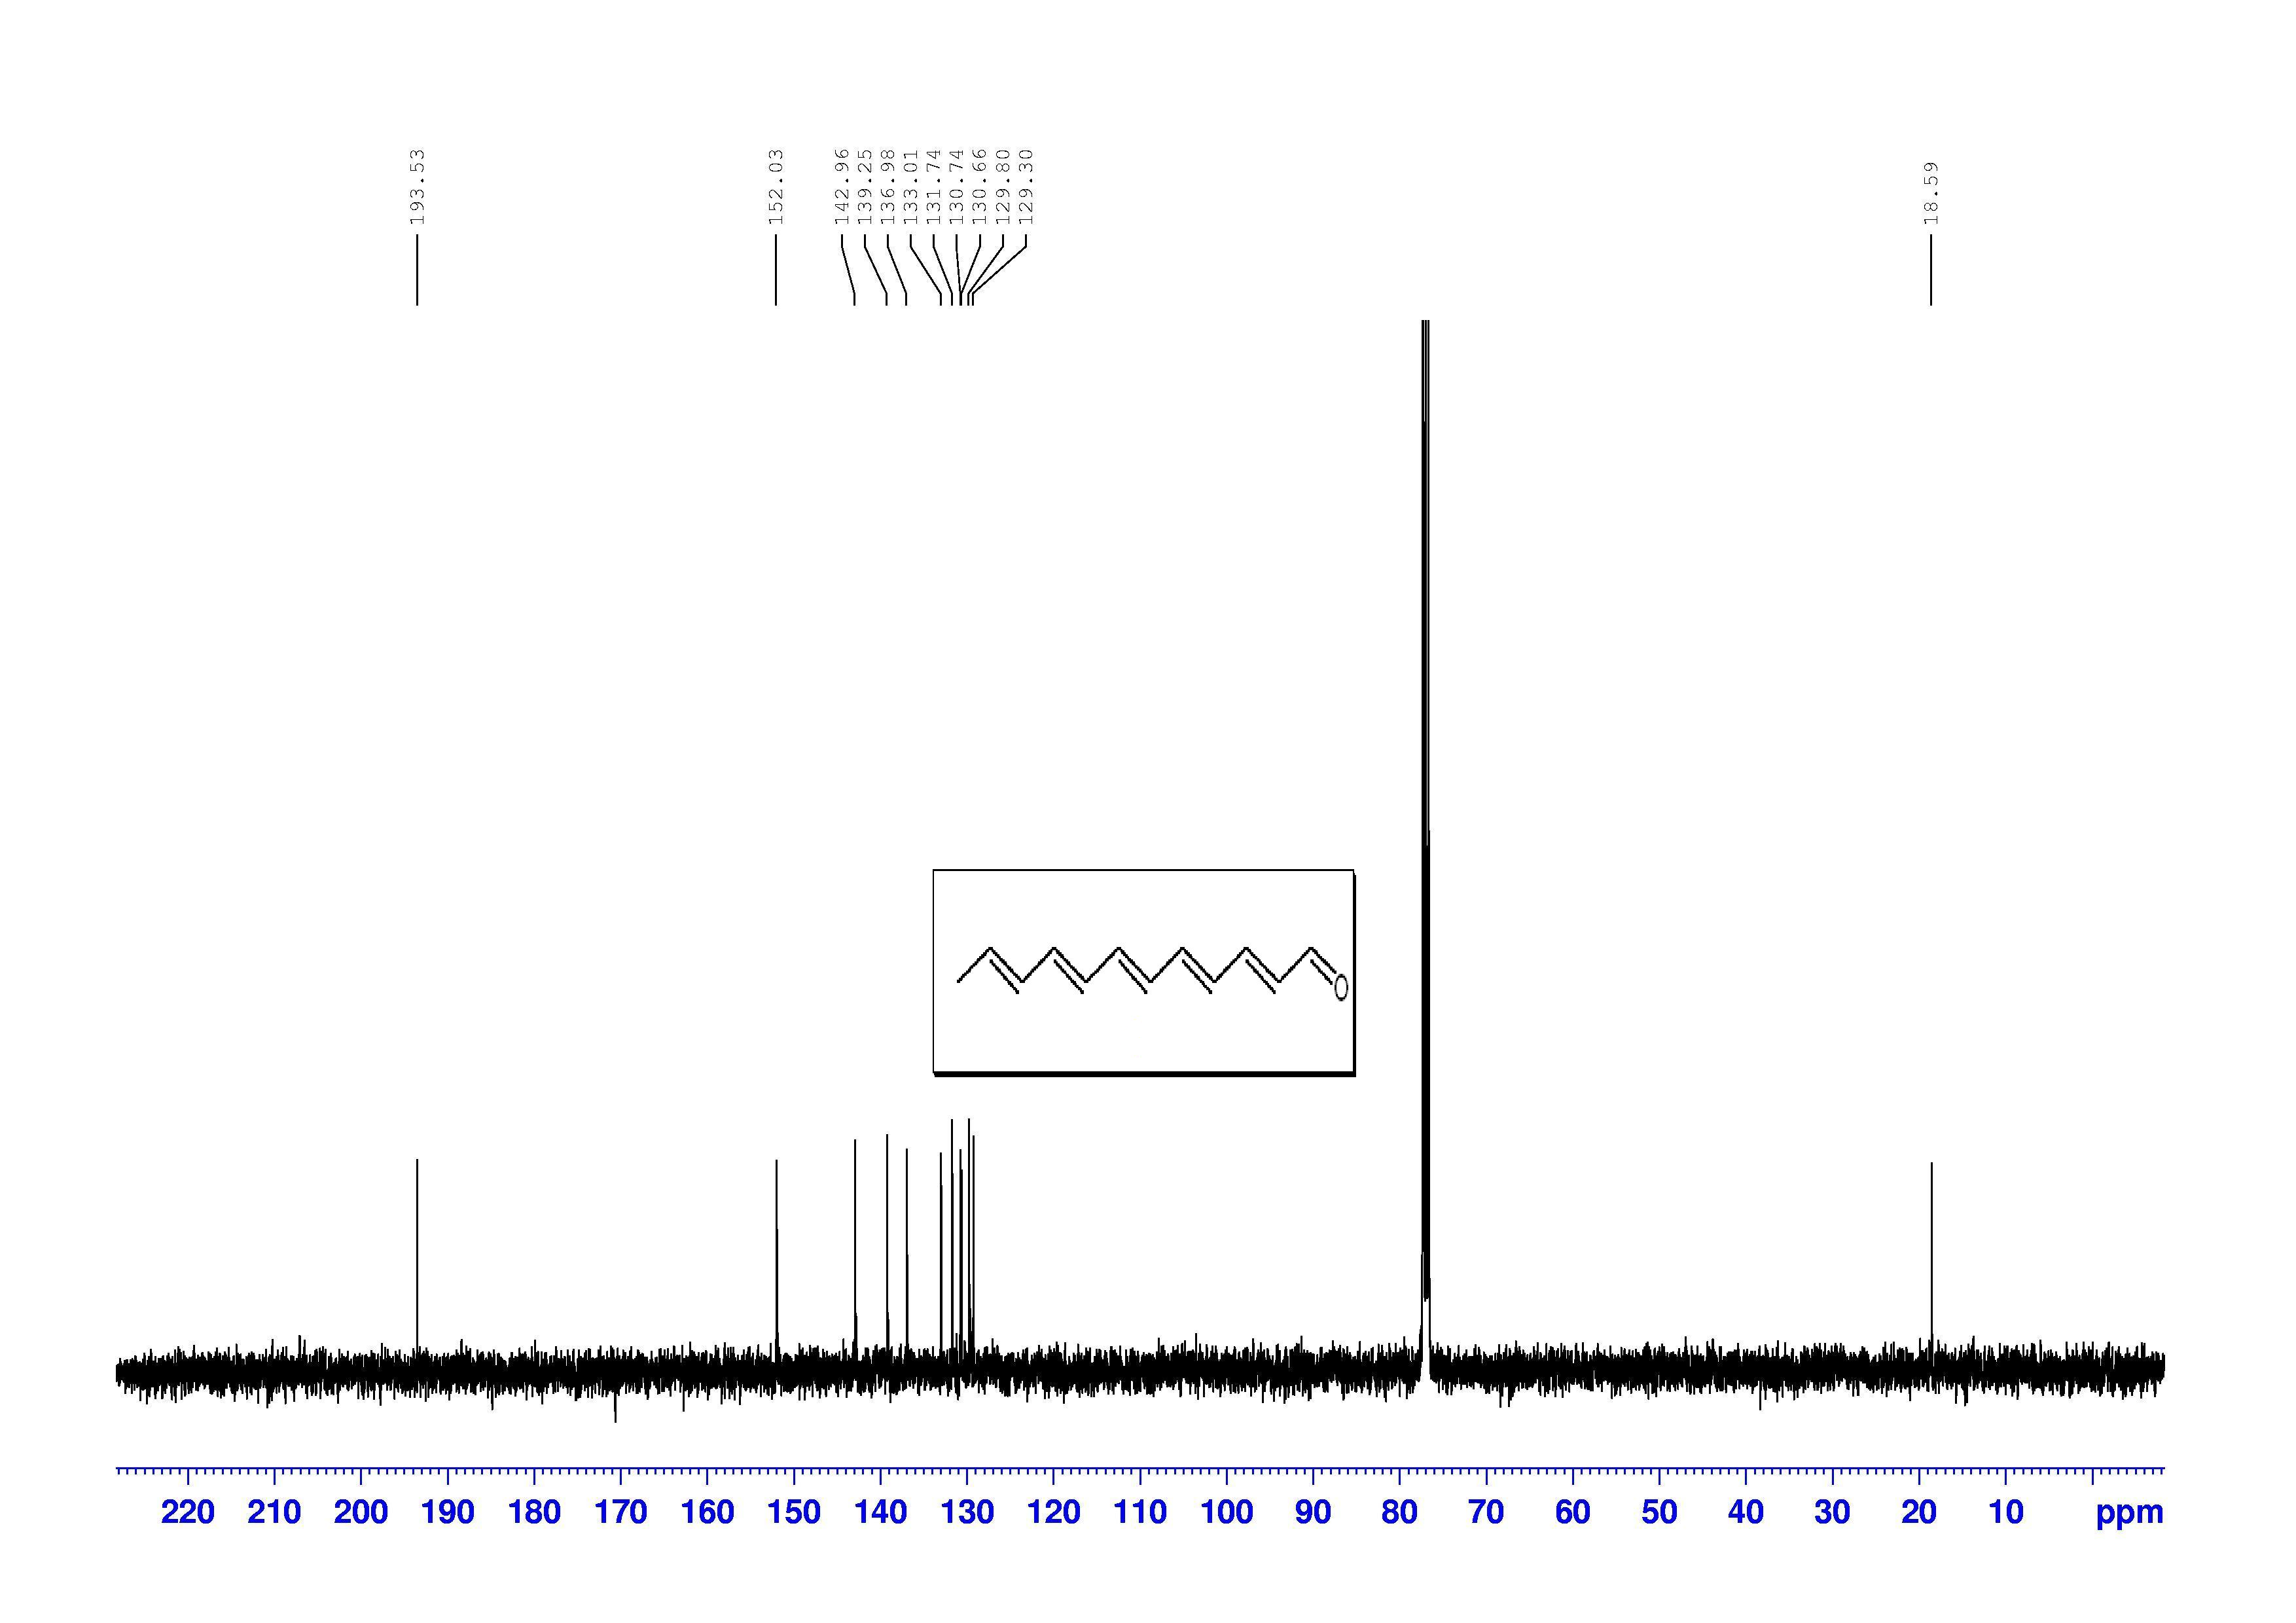
**

**(3E,5E,7E,9E,11E,13E)-Pentadeca-3,5,7,9,11,13-hexaen-2-one (3).** To a solution of KO*t*Bu (56 mg, 0.5 mmol) in THF (10 ml) at 0 °C was slowly added the phosphonate (83 mg, 0.5 mmol). After the addition, the suspension turned clear. The aldehyde **12** (43 mg, 0.25 mmol) in THF (1 ml) was added via syringe. The reaction mixture was stirred at 0 °C for 15 min then heated to 60oC, monitored by TLC, the mixture was concentrated and purified by silica gel column chromatography directly, afford 35 mg yellowish solid, yield 66 % . **IR** 1676 cm-1 (C=O), **HR-MS (ESI)** *m/e* = 215.1432 (MH+), **1H NMR (CDCl3, 300 MHz),** δ1.82 (d, J = 6.8 Hz, 3H), 2.29 (s, 3H), 5.78-5.85 (m, 1H), 6.11-6.72 (m, 10H), 7.15-7.28 (m, 1H). **13C NMR (CDCl3, 75 MHz),** δ18.5, 27.4, 129.6, 130.1, 130.2, 131.4, 131.6, 131.8, 131.9, 135.3, 136.3, 137.9, 141.8, 143.4, 198.4.

**1H NMR spectrum of 3**

**
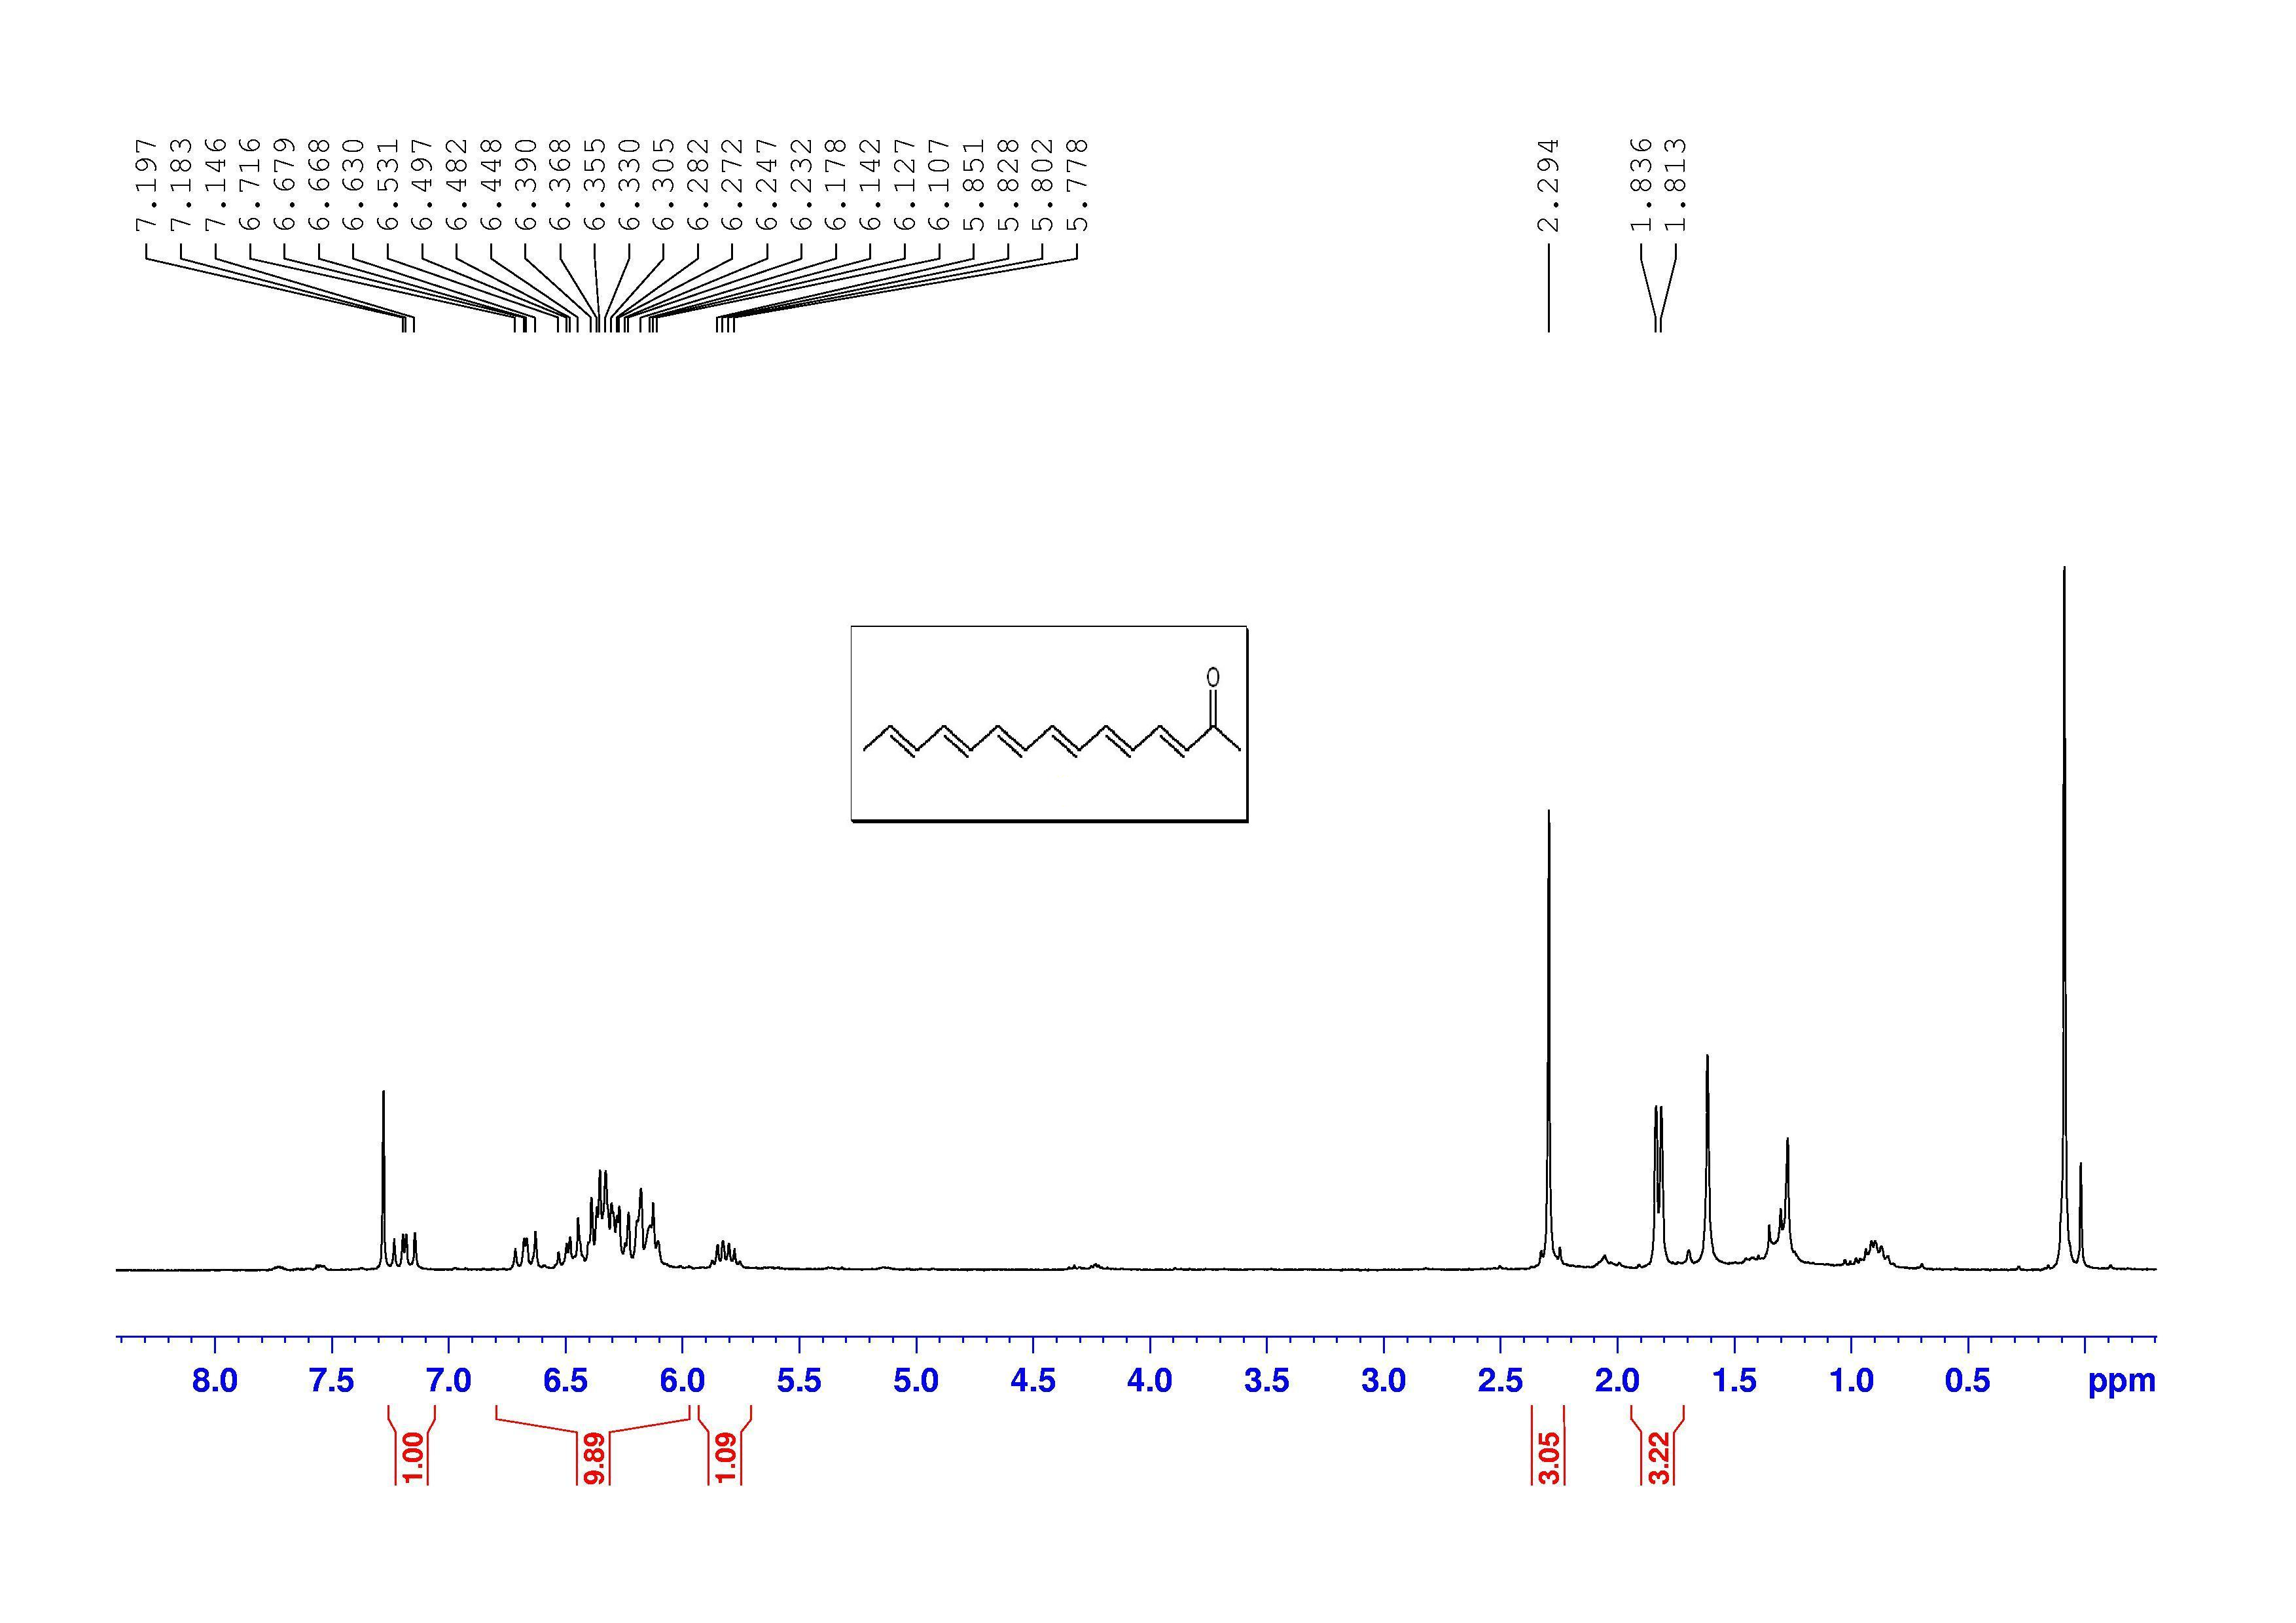
**

**13C NMR spectrum of 3**


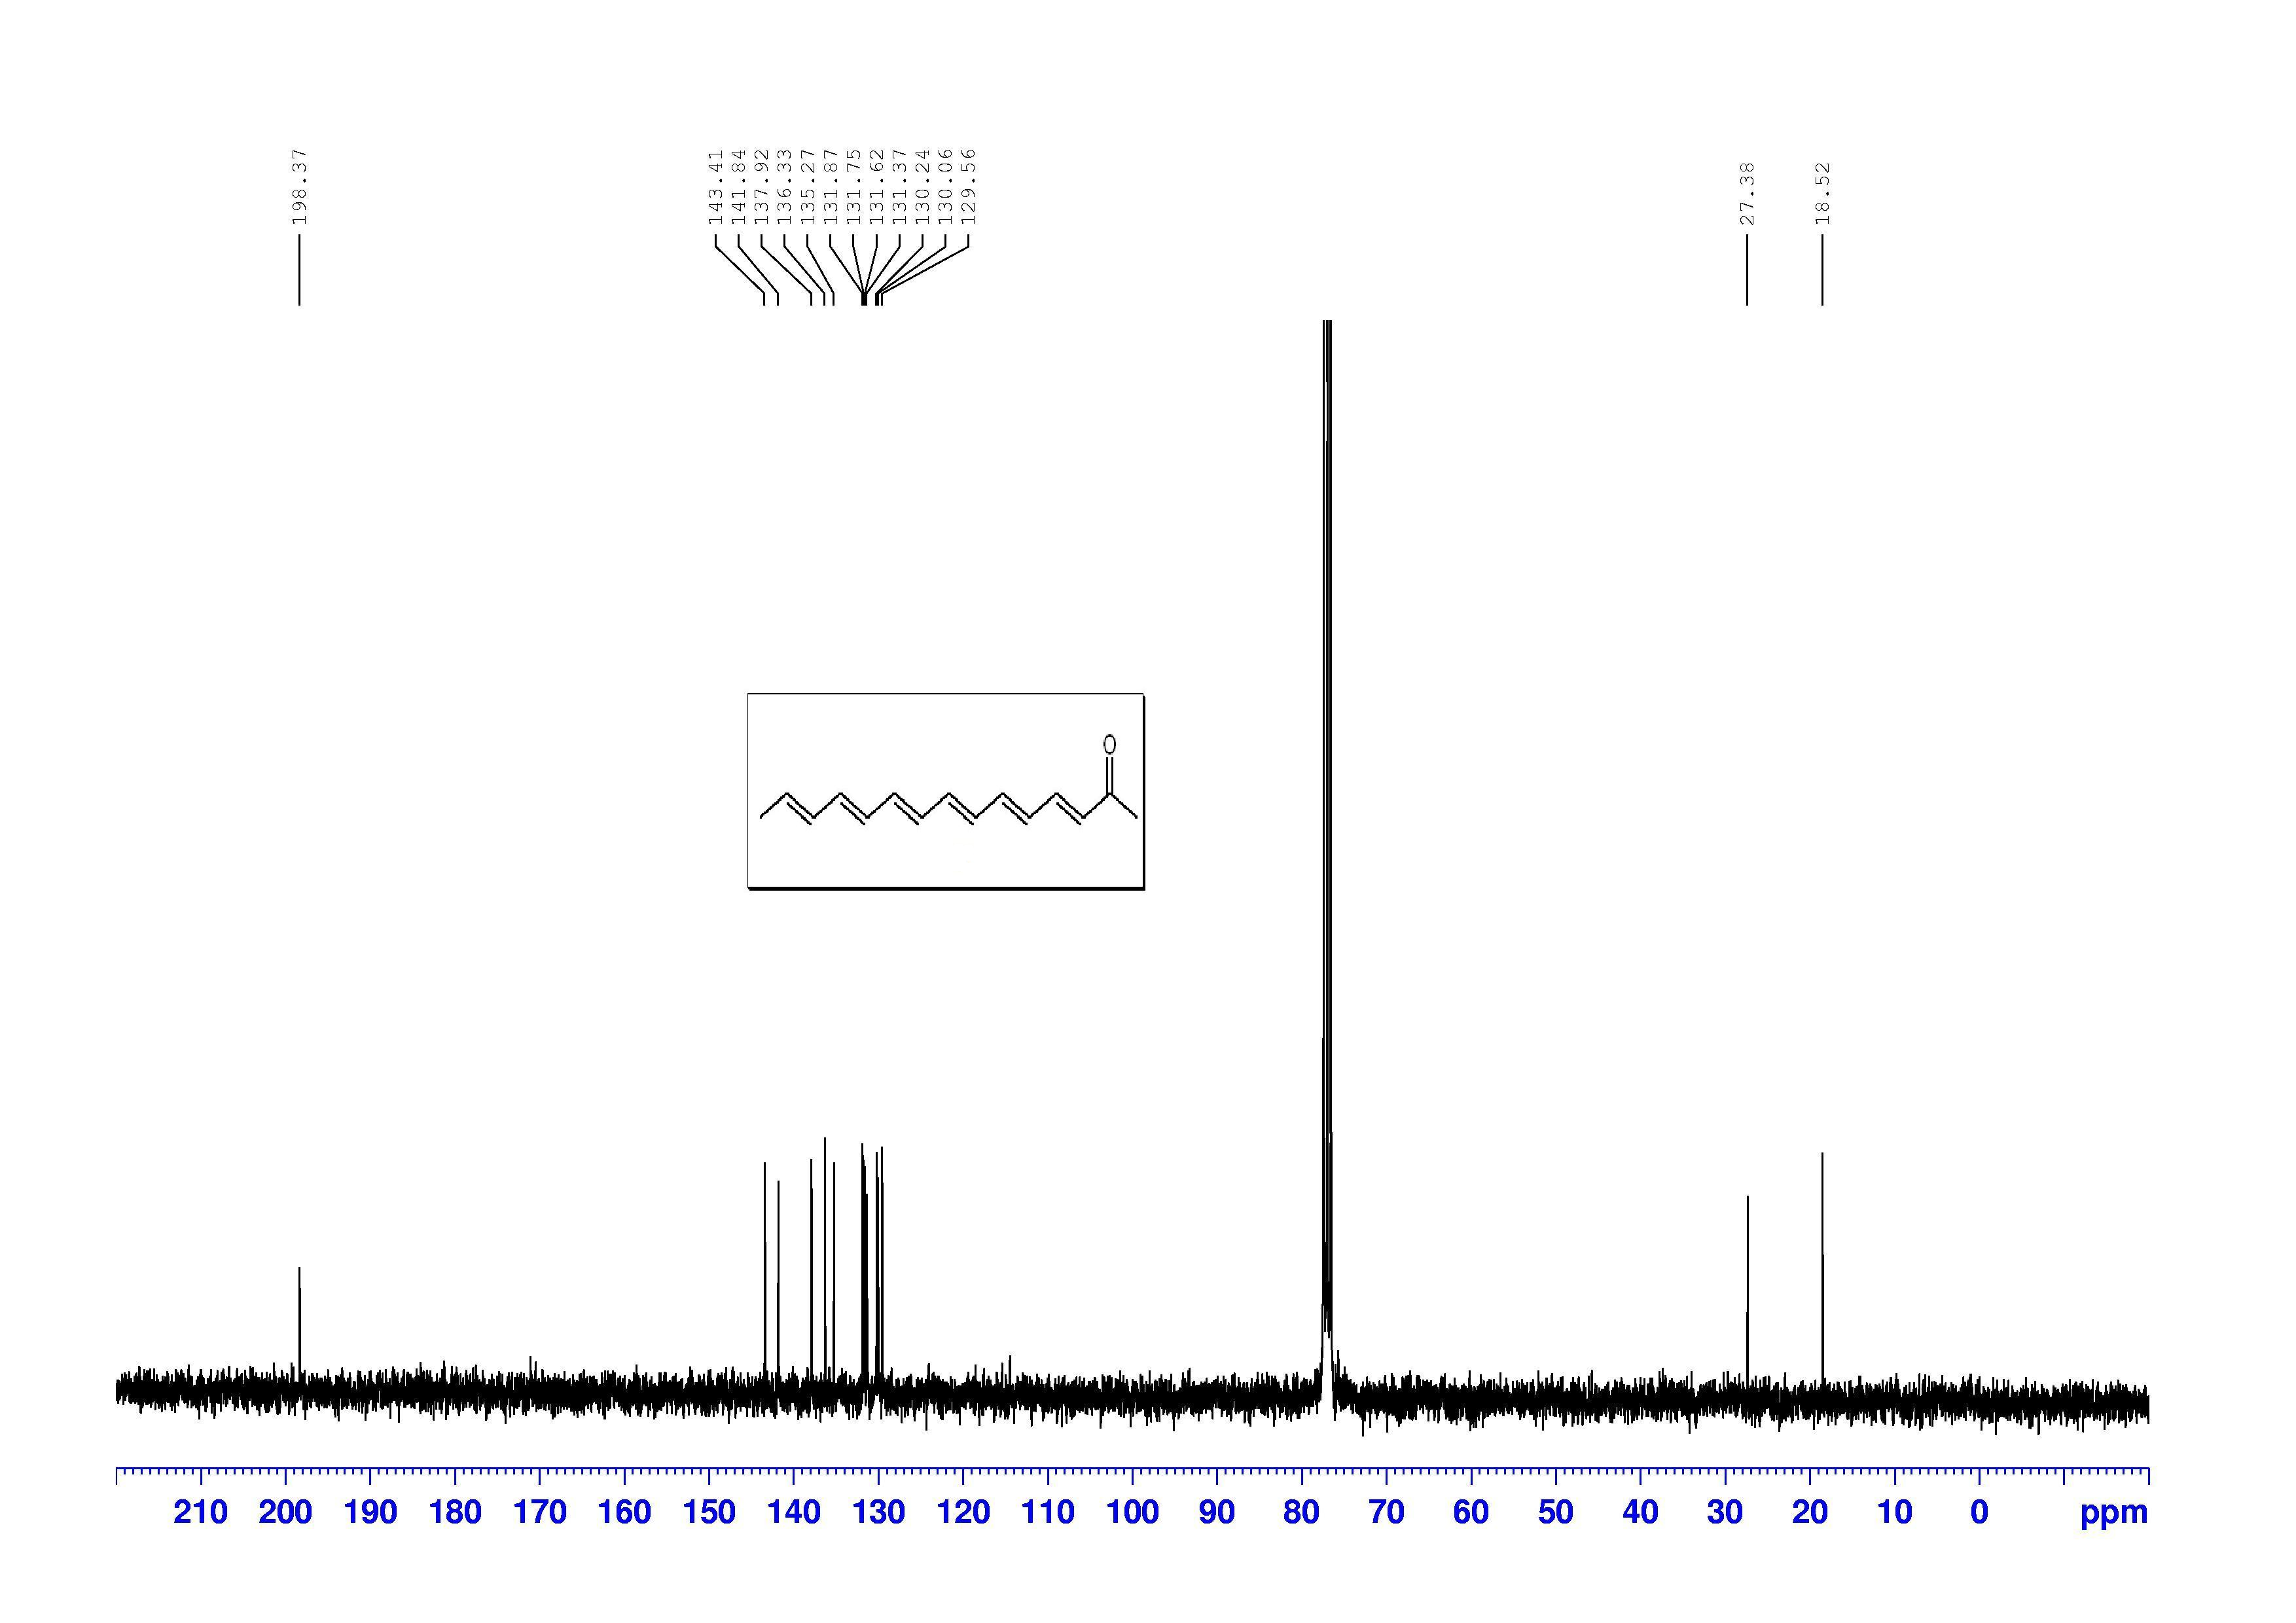


**Table S1**. Proton chemical shifts for the isolated and synthetic all-*trans* pentadeca-3,5,7,9,11,13-hexaen-2-one.

|  | Isolated | Synthetic |
| --- | --- | --- |
| Proton | δH | δH |
| H1 | 2.30 | 2.29 |
| H3 | 6.13 | 6.13 |
| H4 | 7.18 | 7.18 |
| H5 | 6.34 | 6.35 |
| H6 | 6.66 | 6.67 |
| H7 | 6.38 | 6.36 |
| H8-H12 | 6.2-6.5 | 6.2-6.5 |
| H13 | 6.16 | 6.16 |
| H14 | 5.80 | 5.82 |
| H15 | 1.80 | 1.82 |

**References:**

1. W. Liu, S. D. Christenson, S. Standage and B. Shen, *Science (New York, N.Y*, 2002, **297**, 1170-1173.

2. J. Ahlert, E. Shepard, N. Lomovskaya, E. Zazopoulos, A. Staffa, B. O. Bachmann, K. Huang, L. Fonstein, A. Czisny, R. E. Whitwam, C. M. Farnet and J. S. Thorson, *Science (New York, N.Y*, 2002, **297**, 1173-1176.

3. Q. Gao and J. S. Thorson, *FEMS Microbiol. Lett.*, 2008, **282**, 105-114.

4. R. Kong, L. P. Goh, C. W. Liew, Q. S. Ho, E. Murugan, B. Li, K. Tang and Z.-X. Liang, *J. Am. Chem. Soc.*, 2008, **130**, 8142-8143.

5. M. Kotada, R. Kong, I. Qureshi, Q. Ho, H. Sun, C. W. Liew, L. P. Goh, P. Cheung, Y. Mu, J. Lescar and Z.-X. Liang, *J. Biol. Chem.*, 2008, **284** 15739-15749.

6. L. Novak, P. Gy., P. Kovacs, P. Kolonits and C. Szantay, *Tetrahedron*, 1995, **51**, 9367-9374.

7. S. V. Ley, S. C. Smith and P. R. Woodward, *Tetrahedron Lett.*, 1992, **48**, 1145-1174.

8. E. Pini, V. Bertacche, F. Molinari, D. Romano and G. R., *Tetrahedron*, 2008, **64**, 8638-8641.

9. P. E. Blatz and J. A. Tompkins, *J. Am. Chem. Soc.*, 1992, **114**, 3951-3956.
